# Supplementary material
Source: ML conference proceedings conference paper supplement (https://openreview.net/forum?id=rpcnvW33EG)
Supplement: supplementary_material [file attachment]

# SUPPLEMENTARY MATERIAL FOR “OPERATIONALIZING DATA MINIMIZATION FOR PRIVACY-PRESERVING LLM PROMPTING”

## 1 FULL PER-TYPE BREAKDOWN RESULTS

We report full per-type weighted results for all datasets (CaseHOLD, MedQA, ShareGPT90K, and WildChat), under both Oracle and Prediction settings, across all nine evaluated models.

For each (dataset, setting, model) combination, we provide detailed breakdowns over entity types, including weighted Redact, Abstract, and Retain rates.

### 1.1 CASEHOLD

| Type                  | Weighted Redact         | Weighted Abstract    | Weighted Retain       |
|-----------------------|-------------------------|----------------------|-----------------------|
| NAME                  | 98.94% (93/94)          | 0.00% (0/94)         | 1.06% (1/94)          |
| TIME                  | 96.61% (57/59)          | 1.69% (1/59)         | 1.69% (1/59)          |
| GEOLOCATION           | 96.15% (75/78)          | 1.28% (1/78)         | 2.56% (2/78)          |
| AFFILIATION           | 93.17% (150/161)        | 1.86% (3/161)        | 4.97% (8/161)         |
| RACE                  | 100.00% (4/4)           | 0.00% (0/4)          | 0.00% (0/4)           |
| ETHNICITY             | 100.00% (1/1)           | 0.00% (0/1)          | 0.00% (0/1)           |
| ADDRESS               | 100.00% (1/1)           | 0.00% (0/1)          | 0.00% (0/1)           |
| INCOME                | 100.00% (1/1)           | 0.00% (0/1)          | 0.00% (0/1)           |
| AGE                   | 100.00% (1/1)           | 0.00% (0/1)          | 0.00% (0/1)           |
| HEALTH_INFORMATION    | 100.00% (1/1)           | 0.00% (0/1)          | 0.00% (0/1)           |
| FINANCIAL_INFORMATION | 100.00% (1/1)           | 0.00% (0/1)          | 0.00% (0/1)           |
| <b>Overall</b>        | <b>95.77% (385/402)</b> | <b>1.24% (5/402)</b> | <b>2.99% (12/402)</b> |

Table 1: Weighted Results per Type and Overall (Oracle for **CaseHOLD**), Model: **gpt-4.1-nano**

| Type                  | Weighted Redact         | Weighted Abstract    | Weighted Retain      |
|-----------------------|-------------------------|----------------------|----------------------|
| NAME                  | 98.94% (93/94)          | 0.00% (0/94)         | 1.06% (1/94)         |
| TIME                  | 100.00% (59/59)         | 0.00% (0/59)         | 0.00% (0/59)         |
| GEOLOCATION           | 100.00% (78/78)         | 0.00% (0/78)         | 0.00% (0/78)         |
| AFFILIATION           | 100.00% (161/161)       | 0.00% (0/161)        | 0.00% (0/161)        |
| RACE                  | 100.00% (4/4)           | 0.00% (0/4)          | 0.00% (0/4)          |
| ETHNICITY             | 100.00% (1/1)           | 0.00% (0/1)          | 0.00% (0/1)          |
| ADDRESS               | 100.00% (1/1)           | 0.00% (0/1)          | 0.00% (0/1)          |
| INCOME                | 100.00% (1/1)           | 0.00% (0/1)          | 0.00% (0/1)          |
| AGE                   | 100.00% (1/1)           | 0.00% (0/1)          | 0.00% (0/1)          |
| HEALTH_INFORMATION    | 100.00% (1/1)           | 0.00% (0/1)          | 0.00% (0/1)          |
| FINANCIAL_INFORMATION | 100.00% (1/1)           | 0.00% (0/1)          | 0.00% (0/1)          |
| <b>Overall</b>        | <b>99.75% (401/402)</b> | <b>0.00% (0/402)</b> | <b>0.25% (1/402)</b> |

Table 2: Weighted Results per Type and Overall (Oracle for **CaseHOLD**), Model: **gpt-4.1**

| Type                  | Weighted Redact         | Weighted Abstract    | Weighted Retain      |
|-----------------------|-------------------------|----------------------|----------------------|
| NAME                  | 97.87% (92/94)          | 2.13% (2/94)         | 0.00% (0/94)         |
| TIME                  | 96.61% (57/59)          | 1.69% (1/59)         | 1.69% (1/59)         |
| GEOLOCATION           | 98.72% (77/78)          | 1.28% (1/78)         | 0.00% (0/78)         |
| AFFILIATION           | 100.00% (161/161)       | 0.00% (0/161)        | 0.00% (0/161)        |
| RACE                  | 100.00% (4/4)           | 0.00% (0/4)          | 0.00% (0/4)          |
| ETHNICITY             | 100.00% (1/1)           | 0.00% (0/1)          | 0.00% (0/1)          |
| ADDRESS               | 100.00% (1/1)           | 0.00% (0/1)          | 0.00% (0/1)          |
| INCOME                | 100.00% (1/1)           | 0.00% (0/1)          | 0.00% (0/1)          |
| AGE                   | 100.00% (1/1)           | 0.00% (0/1)          | 0.00% (0/1)          |
| HEALTH_INFORMATION    | 100.00% (1/1)           | 0.00% (0/1)          | 0.00% (0/1)          |
| FINANCIAL_INFORMATION | 100.00% (1/1)           | 0.00% (0/1)          | 0.00% (0/1)          |
| <b>Overall</b>        | <b>98.76% (397/402)</b> | <b>1.00% (4/402)</b> | <b>0.25% (1/402)</b> |

Table 3: Weighted Results per Type and Overall (Oracle for **CaseHOLD**), Model: **gpt-5**

| Type                  | Weighted Redact         | Weighted Abstract    | Weighted Retain      |
|-----------------------|-------------------------|----------------------|----------------------|
| NAME                  | 100.00% (94/94)         | 0.00% (0/94)         | 0.00% (0/94)         |
| TIME                  | 98.31% (58/59)          | 1.69% (1/59)         | 0.00% (0/59)         |
| GEOLOCATION           | 100.00% (78/78)         | 0.00% (0/78)         | 0.00% (0/78)         |
| AFFILIATION           | 99.38% (160/161)        | 0.62% (1/161)        | 0.00% (0/161)        |
| RACE                  | 100.00% (4/4)           | 0.00% (0/4)          | 0.00% (0/4)          |
| ETHNICITY             | 100.00% (1/1)           | 0.00% (0/1)          | 0.00% (0/1)          |
| ADDRESS               | 100.00% (1/1)           | 0.00% (0/1)          | 0.00% (0/1)          |
| INCOME                | 100.00% (1/1)           | 0.00% (0/1)          | 0.00% (0/1)          |
| AGE                   | 100.00% (1/1)           | 0.00% (0/1)          | 0.00% (0/1)          |
| HEALTH_INFORMATION    | 100.00% (1/1)           | 0.00% (0/1)          | 0.00% (0/1)          |
| FINANCIAL_INFORMATION | 100.00% (1/1)           | 0.00% (0/1)          | 0.00% (0/1)          |
| <b>Overall</b>        | <b>99.50% (400/402)</b> | <b>0.50% (2/402)</b> | <b>0.00% (0/402)</b> |

Table 4: Weighted Results per Type and Overall (Oracle for **CaseHOLD**), Model: **claude-3-7-sonnet-20250219**

| Type                  | Weighted Redact          | Weighted Abstract    | Weighted Retain      |
|-----------------------|--------------------------|----------------------|----------------------|
| NAME                  | 100.00% (94/94)          | 0.00% (0/94)         | 0.00% (0/94)         |
| TIME                  | 100.00% (59/59)          | 0.00% (0/59)         | 0.00% (0/59)         |
| GEOLOCATION           | 100.00% (78/78)          | 0.00% (0/78)         | 0.00% (0/78)         |
| AFFILIATION           | 100.00% (161/161)        | 0.00% (0/161)        | 0.00% (0/161)        |
| RACE                  | 100.00% (4/4)            | 0.00% (0/4)          | 0.00% (0/4)          |
| ETHNICITY             | 100.00% (1/1)            | 0.00% (0/1)          | 0.00% (0/1)          |
| ADDRESS               | 100.00% (1/1)            | 0.00% (0/1)          | 0.00% (0/1)          |
| INCOME                | 100.00% (1/1)            | 0.00% (0/1)          | 0.00% (0/1)          |
| AGE                   | 100.00% (1/1)            | 0.00% (0/1)          | 0.00% (0/1)          |
| HEALTH_INFORMATION    | 100.00% (1/1)            | 0.00% (0/1)          | 0.00% (0/1)          |
| FINANCIAL_INFORMATION | 100.00% (1/1)            | 0.00% (0/1)          | 0.00% (0/1)          |
| <b>Overall</b>        | <b>100.00% (402/402)</b> | <b>0.00% (0/402)</b> | <b>0.00% (0/402)</b> |

Table 5: Weighted Results per Type and Overall (Oracle for **CaseHOLD**), Model: **claude-sonnet-4-20250514**

| Type                  | Weighted Redact         | Weighted Abstract     | Weighted Retain        |
|-----------------------|-------------------------|-----------------------|------------------------|
| NAME                  | 84.04% (79/94)          | 5.32% (5/94)          | 10.64% (10/94)         |
| TIME                  | 57.63% (34/59)          | 6.78% (4/59)          | 35.59% (21/59)         |
| GEOLOCATION           | 74.36% (58/78)          | 5.13% (4/78)          | 20.51% (16/78)         |
| AFFILIATION           | 71.43% (115/161)        | 9.94% (16/161)        | 18.63% (30/161)        |
| RACE                  | 100.00% (4/4)           | 0.00% (0/4)           | 0.00% (0/4)            |
| ETHNICITY             | 100.00% (1/1)           | 0.00% (0/1)           | 0.00% (0/1)            |
| ADDRESS               | 100.00% (1/1)           | 0.00% (0/1)           | 0.00% (0/1)            |
| INCOME                | 100.00% (1/1)           | 0.00% (0/1)           | 0.00% (0/1)            |
| AGE                   | 0.00% (0/1)             | 0.00% (0/1)           | 100.00% (1/1)          |
| HEALTH_INFORMATION    | 0.00% (0/1)             | 0.00% (0/1)           | 100.00% (1/1)          |
| FINANCIAL_INFORMATION | 100.00% (1/1)           | 0.00% (0/1)           | 0.00% (0/1)            |
| <b>Overall</b>        | <b>73.13% (294/402)</b> | <b>7.21% (29/402)</b> | <b>19.65% (79/402)</b> |

Table 6: Weighted Results per Type and Overall (Oracle for **CaseHOLD**), Model: **lgai/xaone-deep-32b**

| Type                  | Weighted Redact         | Weighted Abstract    | Weighted Retain       |
|-----------------------|-------------------------|----------------------|-----------------------|
| NAME                  | 95.74% (90/94)          | 0.00% (0/94)         | 4.26% (4/94)          |
| TIME                  | 96.61% (57/59)          | 1.69% (1/59)         | 1.69% (1/59)          |
| GEOLOCATION           | 92.31% (72/78)          | 1.28% (1/78)         | 6.41% (5/78)          |
| AFFILIATION           | 95.65% (154/161)        | 0.62% (1/161)        | 3.73% (6/161)         |
| RACE                  | 75.00% (3/4)            | 25.00% (1/4)         | 0.00% (0/4)           |
| ETHNICITY             | 100.00% (1/1)           | 0.00% (0/1)          | 0.00% (0/1)           |
| ADDRESS               | 100.00% (1/1)           | 0.00% (0/1)          | 0.00% (0/1)           |
| INCOME                | 100.00% (1/1)           | 0.00% (0/1)          | 0.00% (0/1)           |
| AGE                   | 100.00% (1/1)           | 0.00% (0/1)          | 0.00% (0/1)           |
| HEALTH_INFORMATION    | 100.00% (1/1)           | 0.00% (0/1)          | 0.00% (0/1)           |
| FINANCIAL_INFORMATION | 100.00% (1/1)           | 0.00% (0/1)          | 0.00% (0/1)           |
| <b>Overall</b>        | <b>95.02% (382/402)</b> | <b>1.00% (4/402)</b> | <b>3.98% (16/402)</b> |

Table 7: Weighted Results per Type and Overall (Oracle for **CaseHOLD**), Model: **mistralai/mistral-small-3.1-24b-instruct**

| Type                  | Weighted Redact         | Weighted Abstract    | Weighted Retain       |
|-----------------------|-------------------------|----------------------|-----------------------|
| NAME                  | 95.74% (90/94)          | 1.06% (1/94)         | 3.19% (3/94)          |
| TIME                  | 98.31% (58/59)          | 0.00% (0/59)         | 1.69% (1/59)          |
| GEOLOCATION           | 97.44% (76/78)          | 0.00% (0/78)         | 2.56% (2/78)          |
| AFFILIATION           | 97.52% (157/161)        | 0.00% (0/161)        | 2.48% (4/161)         |
| RACE                  | 100.00% (4/4)           | 0.00% (0/4)          | 0.00% (0/4)           |
| ETHNICITY             | 100.00% (1/1)           | 0.00% (0/1)          | 0.00% (0/1)           |
| ADDRESS               | 100.00% (1/1)           | 0.00% (0/1)          | 0.00% (0/1)           |
| INCOME                | 0.00% (0/1)             | 0.00% (0/1)          | 100.00% (1/1)         |
| AGE                   | 100.00% (1/1)           | 0.00% (0/1)          | 0.00% (0/1)           |
| HEALTH_INFORMATION    | 100.00% (1/1)           | 0.00% (0/1)          | 0.00% (0/1)           |
| FINANCIAL_INFORMATION | 100.00% (1/1)           | 0.00% (0/1)          | 0.00% (0/1)           |
| <b>Overall</b>        | <b>97.01% (390/402)</b> | <b>0.25% (1/402)</b> | <b>2.74% (11/402)</b> |

Table 8: Weighted Results per Type and Overall (Oracle for **CaseHOLD**), Model: **qwen/qwen2.5-7b-instruct**

| Type                  | Weighted Redact         | Weighted Abstract     | Weighted Retain         |
|-----------------------|-------------------------|-----------------------|-------------------------|
| NAME                  | 39.36% (37/94)          | 5.32% (5/94)          | 55.32% (52/94)          |
| TIME                  | 35.59% (21/59)          | 5.08% (3/59)          | 59.32% (35/59)          |
| GEOLOCATION           | 38.46% (30/78)          | 8.97% (7/78)          | 52.56% (41/78)          |
| AFFILIATION           | 44.10% (71/161)         | 6.21% (10/161)        | 49.69% (80/161)         |
| RACE                  | 25.00% (1/4)            | 25.00% (1/4)          | 50.00% (2/4)            |
| ETHNICITY             | 100.00% (1/1)           | 0.00% (0/1)           | 0.00% (0/1)             |
| ADDRESS               | 0.00% (0/1)             | 0.00% (0/1)           | 100.00% (1/1)           |
| INCOME                | 0.00% (0/1)             | 0.00% (0/1)           | 100.00% (1/1)           |
| AGE                   | 100.00% (1/1)           | 0.00% (0/1)           | 0.00% (0/1)             |
| HEALTH_INFORMATION    | 100.00% (1/1)           | 0.00% (0/1)           | 0.00% (0/1)             |
| FINANCIAL_INFORMATION | 100.00% (1/1)           | 0.00% (0/1)           | 0.00% (0/1)             |
| <b>Overall</b>        | <b>40.80% (164/402)</b> | <b>6.47% (26/402)</b> | <b>52.74% (212/402)</b> |

Table 9: Weighted Results per Type and Overall (Oracle for **CaseHOLD**), Model: **qwen/qwen2.5-0.5b-instruct**

| Type                  | Weighted Redact         | Weighted Abstract      | Weighted Retain      |
|-----------------------|-------------------------|------------------------|----------------------|
| NAME                  | 71.28% (67/94)          | 28.72% (27/94)         | 0.00% (0/94)         |
| TIME                  | 79.66% (47/59)          | 20.34% (12/59)         | 0.00% (0/59)         |
| GEOLOCATION           | 80.77% (63/78)          | 19.23% (15/78)         | 0.00% (0/78)         |
| AFFILIATION           | 81.99% (132/161)        | 18.01% (29/161)        | 0.00% (0/161)        |
| RACE                  | 75.00% (3/4)            | 25.00% (1/4)           | 0.00% (0/4)          |
| ETHNICITY             | 100.00% (1/1)           | 0.00% (0/1)            | 0.00% (0/1)          |
| ADDRESS               | 100.00% (1/1)           | 0.00% (0/1)            | 0.00% (0/1)          |
| INCOME                | 100.00% (1/1)           | 0.00% (0/1)            | 0.00% (0/1)          |
| AGE                   | 0.00% (0/1)             | 100.00% (1/1)          | 0.00% (0/1)          |
| HEALTH_INFORMATION    | 0.00% (0/1)             | 100.00% (1/1)          | 0.00% (0/1)          |
| FINANCIAL_INFORMATION | 0.00% (0/1)             | 100.00% (1/1)          | 0.00% (0/1)          |
| <b>Overall</b>        | <b>78.36% (315/402)</b> | <b>21.64% (87/402)</b> | <b>0.00% (0/402)</b> |

Table 10: Weighted Results per Type and Overall (Prediction for **CaseHOLD**), Model: **gpt-4.1-nano**

| Type                  | Weighted Redact      | Weighted Abstract       | Weighted Retain       |
|-----------------------|----------------------|-------------------------|-----------------------|
| NAME                  | 0.00% (0/94)         | 100.00% (94/94)         | 0.00% (0/94)          |
| TIME                  | 0.00% (0/59)         | 100.00% (59/59)         | 0.00% (0/59)          |
| GEOLOCATION           | 0.00% (0/78)         | 84.62% (66/78)          | 15.38% (12/78)        |
| AFFILIATION           | 0.00% (0/161)        | 95.03% (153/161)        | 4.97% (8/161)         |
| RACE                  | 0.00% (0/4)          | 75.00% (3/4)            | 25.00% (1/4)          |
| ETHNICITY             | 0.00% (0/1)          | 0.00% (0/1)             | 100.00% (1/1)         |
| ADDRESS               | 0.00% (0/1)          | 100.00% (1/1)           | 0.00% (0/1)           |
| INCOME                | 0.00% (0/1)          | 100.00% (1/1)           | 0.00% (0/1)           |
| AGE                   | 0.00% (0/1)          | 100.00% (1/1)           | 0.00% (0/1)           |
| HEALTH_INFORMATION    | 0.00% (0/1)          | 100.00% (1/1)           | 0.00% (0/1)           |
| FINANCIAL_INFORMATION | 0.00% (0/1)          | 100.00% (1/1)           | 0.00% (0/1)           |
| <b>Overall</b>        | <b>0.00% (0/402)</b> | <b>94.53% (380/402)</b> | <b>5.47% (22/402)</b> |

Table 11: Weighted Results per Type and Overall (Prediction for **CaseHOLD**), Model: **gpt-4.1**

| Type                  | Weighted Redact         | Weighted Abstract     | Weighted Retain       |
|-----------------------|-------------------------|-----------------------|-----------------------|
| NAME                  | 88.30% (83/94)          | 6.38% (6/94)          | 5.32% (5/94)          |
| TIME                  | 86.44% (51/59)          | 13.56% (8/59)         | 0.00% (0/59)          |
| GEOLOCATION           | 76.92% (60/78)          | 10.26% (8/78)         | 12.82% (10/78)        |
| AFFILIATION           | 89.44% (144/161)        | 5.59% (9/161)         | 4.97% (8/161)         |
| RACE                  | 100.00% (4/4)           | 0.00% (0/4)           | 0.00% (0/4)           |
| ETHNICITY             | 100.00% (1/1)           | 0.00% (0/1)           | 0.00% (0/1)           |
| ADDRESS               | 100.00% (1/1)           | 0.00% (0/1)           | 0.00% (0/1)           |
| INCOME                | 100.00% (1/1)           | 0.00% (0/1)           | 0.00% (0/1)           |
| AGE                   | 100.00% (1/1)           | 0.00% (0/1)           | 0.00% (0/1)           |
| HEALTH_INFORMATION    | 100.00% (1/1)           | 0.00% (0/1)           | 0.00% (0/1)           |
| FINANCIAL_INFORMATION | 100.00% (1/1)           | 0.00% (0/1)           | 0.00% (0/1)           |
| <b>Overall</b>        | <b>86.57% (348/402)</b> | <b>7.71% (31/402)</b> | <b>5.72% (23/402)</b> |

Table 12: Weighted Results per Type and Overall (Prediction for **CaseHOLD**), Model: **gpt-5**

| Type                  | Weighted Redact      | Weighted Abstract       | Weighted Retain         |
|-----------------------|----------------------|-------------------------|-------------------------|
| NAME                  | 1.06% (1/94)         | 62.77% (59/94)          | 36.17% (34/94)          |
| TIME                  | 1.69% (1/59)         | 45.76% (27/59)          | 52.54% (31/59)          |
| GEOLOCATION           | 0.00% (0/78)         | 20.51% (16/78)          | 79.49% (62/78)          |
| AFFILIATION           | 0.00% (0/161)        | 32.30% (52/161)         | 67.70% (109/161)        |
| RACE                  | 0.00% (0/4)          | 50.00% (2/4)            | 50.00% (2/4)            |
| ETHNICITY             | 0.00% (0/1)          | 0.00% (0/1)             | 100.00% (1/1)           |
| ADDRESS               | 0.00% (0/1)          | 100.00% (1/1)           | 0.00% (0/1)             |
| INCOME                | 0.00% (0/1)          | 100.00% (1/1)           | 0.00% (0/1)             |
| AGE                   | 0.00% (0/1)          | 0.00% (0/1)             | 100.00% (1/1)           |
| HEALTH_INFORMATION    | 0.00% (0/1)          | 100.00% (1/1)           | 0.00% (0/1)             |
| FINANCIAL_INFORMATION | 0.00% (0/1)          | 100.00% (1/1)           | 0.00% (0/1)             |
| <b>Overall</b>        | <b>0.50% (2/402)</b> | <b>39.80% (160/402)</b> | <b>59.70% (240/402)</b> |

Table 13: Weighted Results per Type and Overall (Prediction for **CaseHOLD**), Model: **claude-3-7-sonnet-20250219**

| Type                  | Weighted Redact       | Weighted Abstract       | Weighted Retain         |
|-----------------------|-----------------------|-------------------------|-------------------------|
| NAME                  | 17.02% (16/94)        | 60.64% (57/94)          | 22.34% (21/94)          |
| TIME                  | 11.86% (7/59)         | 62.71% (37/59)          | 25.42% (15/59)          |
| GEOLOCATION           | 0.00% (0/78)          | 29.49% (23/78)          | 70.51% (55/78)          |
| AFFILIATION           | 3.11% (5/161)         | 35.40% (57/161)         | 61.49% (99/161)         |
| RACE                  | 0.00% (0/4)           | 50.00% (2/4)            | 50.00% (2/4)            |
| ETHNICITY             | 0.00% (0/1)           | 0.00% (0/1)             | 100.00% (1/1)           |
| ADDRESS               | 0.00% (0/1)           | 100.00% (1/1)           | 0.00% (0/1)             |
| INCOME                | 0.00% (0/1)           | 0.00% (0/1)             | 100.00% (1/1)           |
| AGE                   | 0.00% (0/1)           | 100.00% (1/1)           | 0.00% (0/1)             |
| HEALTH_INFORMATION    | 0.00% (0/1)           | 100.00% (1/1)           | 0.00% (0/1)             |
| FINANCIAL_INFORMATION | 0.00% (0/1)           | 100.00% (1/1)           | 0.00% (0/1)             |
| <b>Overall</b>        | <b>6.97% (28/402)</b> | <b>44.78% (180/402)</b> | <b>48.26% (194/402)</b> |

Table 14: Weighted Results per Type and Overall (Prediction for **CaseHOLD**), Model: **claude-sonnet-4-20250514**

| Type                  | Weighted Redact         | Weighted Abstract       | Weighted Retain      |
|-----------------------|-------------------------|-------------------------|----------------------|
| NAME                  | 70.21% (66/94)          | 29.79% (28/94)          | 0.00% (0/94)         |
| TIME                  | 66.10% (39/59)          | 33.90% (20/59)          | 0.00% (0/59)         |
| GEOLOCATION           | 66.67% (52/78)          | 33.33% (26/78)          | 0.00% (0/78)         |
| AFFILIATION           | 72.05% (116/161)        | 27.95% (45/161)         | 0.00% (0/161)        |
| RACE                  | 75.00% (3/4)            | 25.00% (1/4)            | 0.00% (0/4)          |
| ETHNICITY             | 100.00% (1/1)           | 0.00% (0/1)             | 0.00% (0/1)          |
| ADDRESS               | 100.00% (1/1)           | 0.00% (0/1)             | 0.00% (0/1)          |
| INCOME                | 0.00% (0/1)             | 100.00% (1/1)           | 0.00% (0/1)          |
| AGE                   | 100.00% (1/1)           | 0.00% (0/1)             | 0.00% (0/1)          |
| HEALTH_INFORMATION    | 100.00% (1/1)           | 0.00% (0/1)             | 0.00% (0/1)          |
| FINANCIAL_INFORMATION | 100.00% (1/1)           | 0.00% (0/1)             | 0.00% (0/1)          |
| <b>Overall</b>        | <b>69.90% (281/402)</b> | <b>30.10% (121/402)</b> | <b>0.00% (0/402)</b> |

Table 15: Weighted Results per Type and Overall (Prediction for **CaseHOLD**), Model: **lgai/xaone-deep-32b**

| Type                  | Weighted Redact      | Weighted Abstract       | Weighted Retain      |
|-----------------------|----------------------|-------------------------|----------------------|
| NAME                  | 0.00% (0/94)         | 100.00% (94/94)         | 0.00% (0/94)         |
| TIME                  | 0.00% (0/59)         | 100.00% (59/59)         | 0.00% (0/59)         |
| GEOLOCATION           | 1.28% (1/78)         | 98.72% (77/78)          | 0.00% (0/78)         |
| AFFILIATION           | 0.00% (0/161)        | 99.38% (160/161)        | 0.62% (1/161)        |
| RACE                  | 0.00% (0/4)          | 100.00% (4/4)           | 0.00% (0/4)          |
| ETHNICITY             | 0.00% (0/1)          | 100.00% (1/1)           | 0.00% (0/1)          |
| ADDRESS               | 0.00% (0/1)          | 100.00% (1/1)           | 0.00% (0/1)          |
| INCOME                | 0.00% (0/1)          | 100.00% (1/1)           | 0.00% (0/1)          |
| AGE                   | 0.00% (0/1)          | 100.00% (1/1)           | 0.00% (0/1)          |
| HEALTH_INFORMATION    | 0.00% (0/1)          | 100.00% (1/1)           | 0.00% (0/1)          |
| FINANCIAL_INFORMATION | 0.00% (0/1)          | 100.00% (1/1)           | 0.00% (0/1)          |
| <b>Overall</b>        | <b>0.25% (1/402)</b> | <b>99.50% (400/402)</b> | <b>0.25% (1/402)</b> |

Table 16: Weighted Results per Type and Overall (Prediction for **CaseHOLD**), Model: **mistralai/mistral-small-3.1-24b-instruct**

| Type                  | Weighted Redact       | Weighted Abstract       | Weighted Retain      |
|-----------------------|-----------------------|-------------------------|----------------------|
| NAME                  | 3.19% (3/94)          | 96.81% (91/94)          | 0.00% (0/94)         |
| TIME                  | 5.08% (3/59)          | 94.92% (56/59)          | 0.00% (0/59)         |
| GEOLOCATION           | 1.28% (1/78)          | 98.72% (77/78)          | 0.00% (0/78)         |
| AFFILIATION           | 4.97% (8/161)         | 95.03% (153/161)        | 0.00% (0/161)        |
| RACE                  | 25.00% (1/4)          | 75.00% (3/4)            | 0.00% (0/4)          |
| ETHNICITY             | 0.00% (0/1)           | 100.00% (1/1)           | 0.00% (0/1)          |
| ADDRESS               | 0.00% (0/1)           | 100.00% (1/1)           | 0.00% (0/1)          |
| INCOME                | 0.00% (0/1)           | 100.00% (1/1)           | 0.00% (0/1)          |
| AGE                   | 0.00% (0/1)           | 100.00% (1/1)           | 0.00% (0/1)          |
| HEALTH_INFORMATION    | 0.00% (0/1)           | 100.00% (1/1)           | 0.00% (0/1)          |
| FINANCIAL_INFORMATION | 0.00% (0/1)           | 100.00% (1/1)           | 0.00% (0/1)          |
| <b>Overall</b>        | <b>3.98% (16/402)</b> | <b>96.02% (386/402)</b> | <b>0.00% (0/402)</b> |

Table 17: Weighted Results per Type and Overall (Prediction for **CaseHOLD**), Model: **qwen/qwen2.5-7b-instruct**

## 1.2 MEDQA

| Type               | Weighted Redact         | Weighted Abstract     | Weighted Retain       |
|--------------------|-------------------------|-----------------------|-----------------------|
| AGE                | 96.46% (109/113)        | 0.00% (0/113)         | 3.54% (4/113)         |
| GENDER             | 98.28% (57/58)          | 0.00% (0/58)          | 1.72% (1/58)          |
| OCCUPATION         | 100.00% (9/9)           | 0.00% (0/9)           | 0.00% (0/9)           |
| HEALTH_INFORMATION | 87.08% (647/743)        | 2.96% (22/743)        | 9.96% (74/743)        |
| GEOLOCATION        | 94.74% (18/19)          | 0.00% (0/19)          | 5.26% (1/19)          |
| RACE               | 100.00% (8/8)           | 0.00% (0/8)           | 0.00% (0/8)           |
| MARITAL_STATUS     | 100.00% (1/1)           | 0.00% (0/1)           | 0.00% (0/1)           |
| TIME               | 95.00% (19/20)          | 0.00% (0/20)          | 5.00% (1/20)          |
| SEXUAL_ORIENTATION | 100.00% (3/3)           | 0.00% (0/3)           | 0.00% (0/3)           |
| AFFILIATION        | 100.00% (1/1)           | 0.00% (0/1)           | 0.00% (0/1)           |
| DIETARY_PREFERENCE | 100.00% (1/1)           | 0.00% (0/1)           | 0.00% (0/1)           |
| <b>Overall</b>     | <b>89.45% (873/976)</b> | <b>2.25% (22/976)</b> | <b>8.30% (81/976)</b> |

Table 18: Weighted Results per Type and Overall (Oracle for **MedQA**), Model: **gpt-4.1-nano**

| Type               | Weighted Redact         | Weighted Abstract     | Weighted Retain       |
|--------------------|-------------------------|-----------------------|-----------------------|
| AGE                | 98.23% (111/113)        | 1.77% (2/113)         | 0.00% (0/113)         |
| GENDER             | 96.55% (56/58)          | 1.72% (1/58)          | 1.72% (1/58)          |
| OCCUPATION         | 100.00% (9/9)           | 0.00% (0/9)           | 0.00% (0/9)           |
| HEALTH_INFORMATION | 96.90% (720/743)        | 1.48% (11/743)        | 1.62% (12/743)        |
| GEOLOCATION        | 100.00% (19/19)         | 0.00% (0/19)          | 0.00% (0/19)          |
| RACE               | 100.00% (8/8)           | 0.00% (0/8)           | 0.00% (0/8)           |
| MARITAL_STATUS     | 100.00% (1/1)           | 0.00% (0/1)           | 0.00% (0/1)           |
| TIME               | 100.00% (20/20)         | 0.00% (0/20)          | 0.00% (0/20)          |
| SEXUAL_ORIENTATION | 100.00% (3/3)           | 0.00% (0/3)           | 0.00% (0/3)           |
| AFFILIATION        | 100.00% (1/1)           | 0.00% (0/1)           | 0.00% (0/1)           |
| DIETARY_PREFERENCE | 100.00% (1/1)           | 0.00% (0/1)           | 0.00% (0/1)           |
| <b>Overall</b>     | <b>97.23% (949/976)</b> | <b>1.43% (14/976)</b> | <b>1.33% (13/976)</b> |

Table 19: Weighted Results per Type and Overall (Oracle for **MedQA**), Model: **gpt-4.1**

| Type               | Weighted Redact         | Weighted Abstract     | Weighted Retain       |
|--------------------|-------------------------|-----------------------|-----------------------|
| AGE                | 100.00% (113/113)       | 0.00% (0/113)         | 0.00% (0/113)         |
| GENDER             | 100.00% (58/58)         | 0.00% (0/58)          | 0.00% (0/58)          |
| OCCUPATION         | 100.00% (9/9)           | 0.00% (0/9)           | 0.00% (0/9)           |
| HEALTH_INFORMATION | 95.42% (709/743)        | 2.69% (20/743)        | 1.88% (14/743)        |
| GEOLOCATION        | 94.74% (18/19)          | 5.26% (1/19)          | 0.00% (0/19)          |
| RACE               | 100.00% (8/8)           | 0.00% (0/8)           | 0.00% (0/8)           |
| MARITAL_STATUS     | 100.00% (1/1)           | 0.00% (0/1)           | 0.00% (0/1)           |
| TIME               | 100.00% (20/20)         | 0.00% (0/20)          | 0.00% (0/20)          |
| SEXUAL_ORIENTATION | 100.00% (3/3)           | 0.00% (0/3)           | 0.00% (0/3)           |
| AFFILIATION        | 100.00% (1/1)           | 0.00% (0/1)           | 0.00% (0/1)           |
| DIETARY_PREFERENCE | 100.00% (1/1)           | 0.00% (0/1)           | 0.00% (0/1)           |
| <b>Overall</b>     | <b>96.41% (941/976)</b> | <b>2.15% (21/976)</b> | <b>1.43% (14/976)</b> |

Table 20: Weighted Results per Type and Overall (Oracle for **MedQA**), Model: **gpt-5**

| Type               | Weighted Redact         | Weighted Abstract       | Weighted Retain         |
|--------------------|-------------------------|-------------------------|-------------------------|
| AGE                | 79.65% (90/113)         | 10.62% (12/113)         | 9.73% (11/113)          |
| GENDER             | 70.69% (41/58)          | 13.79% (8/58)           | 15.52% (9/58)           |
| OCCUPATION         | 88.89% (8/9)            | 11.11% (1/9)            | 0.00% (0/9)             |
| HEALTH_INFORMATION | 69.99% (520/743)        | 14.27% (106/743)        | 15.75% (117/743)        |
| GEOLOCATION        | 78.95% (15/19)          | 21.05% (4/19)           | 0.00% (0/19)            |
| RACE               | 87.50% (7/8)            | 0.00% (0/8)             | 12.50% (1/8)            |
| MARITAL_STATUS     | 100.00% (1/1)           | 0.00% (0/1)             | 0.00% (0/1)             |
| TIME               | 55.00% (11/20)          | 25.00% (5/20)           | 20.00% (4/20)           |
| SEXUAL_ORIENTATION | 33.33% (1/3)            | 33.33% (1/3)            | 33.33% (1/3)            |
| AFFILIATION        | 100.00% (1/1)           | 0.00% (0/1)             | 0.00% (0/1)             |
| DIETARY_PREFERENCE | 100.00% (1/1)           | 0.00% (0/1)             | 0.00% (0/1)             |
| <b>Overall</b>     | <b>71.31% (696/976)</b> | <b>14.04% (137/976)</b> | <b>14.65% (143/976)</b> |

Table 21: Weighted Results per Type and Overall (Oracle for **MedQA**), Model: **claude-3-7-sonnet-20250219**

| Type               | Weighted Redact         | Weighted Abstract     | Weighted Retain       |
|--------------------|-------------------------|-----------------------|-----------------------|
| AGE                | 100.00% (113/113)       | 0.00% (0/113)         | 0.00% (0/113)         |
| GENDER             | 100.00% (58/58)         | 0.00% (0/58)          | 0.00% (0/58)          |
| OCCUPATION         | 100.00% (9/9)           | 0.00% (0/9)           | 0.00% (0/9)           |
| HEALTH_INFORMATION | 94.75% (704/743)        | 3.50% (26/743)        | 1.75% (13/743)        |
| GEOLOCATION        | 100.00% (19/19)         | 0.00% (0/19)          | 0.00% (0/19)          |
| RACE               | 100.00% (8/8)           | 0.00% (0/8)           | 0.00% (0/8)           |
| MARITAL_STATUS     | 100.00% (1/1)           | 0.00% (0/1)           | 0.00% (0/1)           |
| TIME               | 100.00% (20/20)         | 0.00% (0/20)          | 0.00% (0/20)          |
| SEXUAL_ORIENTATION | 100.00% (3/3)           | 0.00% (0/3)           | 0.00% (0/3)           |
| AFFILIATION        | 100.00% (1/1)           | 0.00% (0/1)           | 0.00% (0/1)           |
| DIETARY_PREFERENCE | 100.00% (1/1)           | 0.00% (0/1)           | 0.00% (0/1)           |
| <b>Overall</b>     | <b>96.00% (937/976)</b> | <b>2.66% (26/976)</b> | <b>1.33% (13/976)</b> |

Table 22: Weighted Results per Type and Overall (Oracle for **MedQA**), Model: **claude-sonnet-4-20250514**

| Type               | Weighted Redact         | Weighted Abstract       | Weighted Retain         |
|--------------------|-------------------------|-------------------------|-------------------------|
| AGE                | 80.53% (91/113)         | 11.50% (13/113)         | 7.96% (9/113)           |
| GENDER             | 82.76% (48/58)          | 6.90% (4/58)            | 10.34% (6/58)           |
| OCCUPATION         | 77.78% (7/9)            | 22.22% (2/9)            | 0.00% (0/9)             |
| HEALTH_INFORMATION | 74.16% (551/743)        | 11.98% (89/743)         | 13.86% (103/743)        |
| GEOLOCATION        | 84.21% (16/19)          | 5.26% (1/19)            | 10.53% (2/19)           |
| RACE               | 100.00% (8/8)           | 0.00% (0/8)             | 0.00% (0/8)             |
| MARITAL_STATUS     | 100.00% (1/1)           | 0.00% (0/1)             | 0.00% (0/1)             |
| TIME               | 70.00% (14/20)          | 15.00% (3/20)           | 15.00% (3/20)           |
| SEXUAL_ORIENTATION | 66.67% (2/3)            | 0.00% (0/3)             | 33.33% (1/3)            |
| AFFILIATION        | 100.00% (1/1)           | 0.00% (0/1)             | 0.00% (0/1)             |
| DIETARY_PREFERENCE | 100.00% (1/1)           | 0.00% (0/1)             | 0.00% (0/1)             |
| <b>Overall</b>     | <b>75.82% (740/976)</b> | <b>11.48% (112/976)</b> | <b>12.70% (124/976)</b> |

Table 23: Weighted Results per Type and Overall (Oracle for **MedQA**), Model: **lgai/xaone-deep-32b**

| Type               | Weighted Redact         | Weighted Abstract     | Weighted Retain       |
|--------------------|-------------------------|-----------------------|-----------------------|
| AGE                | 100.00% (113/113)       | 0.00% (0/113)         | 0.00% (0/113)         |
| GENDER             | 100.00% (58/58)         | 0.00% (0/58)          | 0.00% (0/58)          |
| OCCUPATION         | 88.89% (8/9)            | 11.11% (1/9)          | 0.00% (0/9)           |
| HEALTH_INFORMATION | 96.37% (716/743)        | 2.29% (17/743)        | 1.35% (10/743)        |
| GEOLOCATION        | 100.00% (19/19)         | 0.00% (0/19)          | 0.00% (0/19)          |
| RACE               | 100.00% (8/8)           | 0.00% (0/8)           | 0.00% (0/8)           |
| MARITAL_STATUS     | 100.00% (1/1)           | 0.00% (0/1)           | 0.00% (0/1)           |
| TIME               | 100.00% (20/20)         | 0.00% (0/20)          | 0.00% (0/20)          |
| SEXUAL_ORIENTATION | 100.00% (3/3)           | 0.00% (0/3)           | 0.00% (0/3)           |
| AFFILIATION        | 100.00% (1/1)           | 0.00% (0/1)           | 0.00% (0/1)           |
| DIETARY_PREFERENCE | 0.00% (0/1)             | 100.00% (1/1)         | 0.00% (0/1)           |
| <b>Overall</b>     | <b>97.03% (947/976)</b> | <b>1.95% (19/976)</b> | <b>1.02% (10/976)</b> |

Table 24: Weighted Results per Type and Overall (Oracle for **MedQA**), Model: **mistralai/mistral-small-3.1-24b-instruct**

| Type               | Weighted Redact         | Weighted Abstract     | Weighted Retain       |
|--------------------|-------------------------|-----------------------|-----------------------|
| AGE                | 94.69% (107/113)        | 2.65% (3/113)         | 2.65% (3/113)         |
| GENDER             | 93.10% (54/58)          | 5.17% (3/58)          | 1.72% (1/58)          |
| OCCUPATION         | 88.89% (8/9)            | 11.11% (1/9)          | 0.00% (0/9)           |
| HEALTH_INFORMATION | 88.29% (656/743)        | 6.86% (51/743)        | 4.85% (36/743)        |
| GEOLOCATION        | 89.47% (17/19)          | 10.53% (2/19)         | 0.00% (0/19)          |
| RACE               | 100.00% (8/8)           | 0.00% (0/8)           | 0.00% (0/8)           |
| MARITAL_STATUS     | 100.00% (1/1)           | 0.00% (0/1)           | 0.00% (0/1)           |
| TIME               | 90.00% (18/20)          | 10.00% (2/20)         | 0.00% (0/20)          |
| SEXUAL_ORIENTATION | 100.00% (3/3)           | 0.00% (0/3)           | 0.00% (0/3)           |
| AFFILIATION        | 100.00% (1/1)           | 0.00% (0/1)           | 0.00% (0/1)           |
| DIETARY_PREFERENCE | 0.00% (0/1)             | 100.00% (1/1)         | 0.00% (0/1)           |
| <b>Overall</b>     | <b>89.45% (873/976)</b> | <b>6.45% (63/976)</b> | <b>4.10% (40/976)</b> |

Table 25: Weighted Results per Type and Overall (Oracle for **MedQA**), Model: **qwen/qwen2.5-7b-instruct**

| Type               | Weighted Redact         | Weighted Abstract       | Weighted Retain         |
|--------------------|-------------------------|-------------------------|-------------------------|
| AGE                | 42.48% (48/113)         | 13.27% (15/113)         | 44.25% (50/113)         |
| GENDER             | 39.66% (23/58)          | 10.34% (6/58)           | 50.00% (29/58)          |
| OCCUPATION         | 55.56% (5/9)            | 11.11% (1/9)            | 33.33% (3/9)            |
| HEALTH_INFORMATION | 24.09% (179/743)        | 14.27% (106/743)        | 61.64% (458/743)        |
| GEOLOCATION        | 31.58% (6/19)           | 15.79% (3/19)           | 52.63% (10/19)          |
| RACE               | 50.00% (4/8)            | 12.50% (1/8)            | 37.50% (3/8)            |
| MARITAL_STATUS     | 100.00% (1/1)           | 0.00% (0/1)             | 0.00% (0/1)             |
| TIME               | 45.00% (9/20)           | 10.00% (2/20)           | 45.00% (9/20)           |
| SEXUAL_ORIENTATION | 33.33% (1/3)            | 33.33% (1/3)            | 33.33% (1/3)            |
| AFFILIATION        | 100.00% (1/1)           | 0.00% (0/1)             | 0.00% (0/1)             |
| DIETARY_PREFERENCE | 100.00% (1/1)           | 0.00% (0/1)             | 0.00% (0/1)             |
| <b>Overall</b>     | <b>28.48% (278/976)</b> | <b>13.83% (135/976)</b> | <b>57.68% (563/976)</b> |

Table 26: Weighted Results per Type and Overall (Oracle for **MedQA**), Model: **qwen/qwen2.5-0.5b-instruct**

| Type               | Weighted Redact         | Weighted Abstract       | Weighted Retain         |
|--------------------|-------------------------|-------------------------|-------------------------|
| AGE                | 41.59% (47/113)         | 58.41% (66/113)         | 0.00% (0/113)           |
| GENDER             | 37.93% (22/58)          | 60.34% (35/58)          | 1.72% (1/58)            |
| OCCUPATION         | 66.67% (6/9)            | 33.33% (3/9)            | 0.00% (0/9)             |
| HEALTH_INFORMATION | 21.27% (158/743)        | 60.97% (453/743)        | 17.77% (132/743)        |
| GEOLOCATION        | 57.89% (11/19)          | 42.11% (8/19)           | 0.00% (0/19)            |
| RACE               | 37.50% (3/8)            | 62.50% (5/8)            | 0.00% (0/8)             |
| MARITAL_STATUS     | 100.00% (1/1)           | 0.00% (0/1)             | 0.00% (0/1)             |
| TIME               | 65.00% (13/20)          | 35.00% (7/20)           | 0.00% (0/20)            |
| SEXUAL_ORIENTATION | 33.33% (1/3)            | 66.67% (2/3)            | 0.00% (0/3)             |
| AFFILIATION        | 100.00% (1/1)           | 0.00% (0/1)             | 0.00% (0/1)             |
| DIETARY_PREFERENCE | 100.00% (1/1)           | 0.00% (0/1)             | 0.00% (0/1)             |
| <b>Overall</b>     | <b>27.05% (264/976)</b> | <b>59.32% (579/976)</b> | <b>13.63% (133/976)</b> |

Table 27: Weighted Results per Type and Overall (Prediction for **MedQA**), Model: **gpt-4.1-nano**

| Type               | Weighted Redact      | Weighted Abstract       | Weighted Retain       |
|--------------------|----------------------|-------------------------|-----------------------|
| AGE                | 0.00% (0/113)        | 99.12% (112/113)        | 0.88% (1/113)         |
| GENDER             | 0.00% (0/58)         | 98.28% (57/58)          | 1.72% (1/58)          |
| OCCUPATION         | 0.00% (0/9)          | 100.00% (9/9)           | 0.00% (0/9)           |
| HEALTH_INFORMATION | 0.00% (0/743)        | 98.52% (732/743)        | 1.48% (11/743)        |
| GEOLOCATION        | 10.53% (2/19)        | 89.47% (17/19)          | 0.00% (0/19)          |
| RACE               | 0.00% (0/8)          | 100.00% (8/8)           | 0.00% (0/8)           |
| MARITAL_STATUS     | 0.00% (0/1)          | 100.00% (1/1)           | 0.00% (0/1)           |
| TIME               | 0.00% (0/20)         | 100.00% (20/20)         | 0.00% (0/20)          |
| SEXUAL_ORIENTATION | 0.00% (0/3)          | 100.00% (3/3)           | 0.00% (0/3)           |
| AFFILIATION        | 0.00% (0/1)          | 100.00% (1/1)           | 0.00% (0/1)           |
| DIETARY_PREFERENCE | 0.00% (0/1)          | 100.00% (1/1)           | 0.00% (0/1)           |
| <b>Overall</b>     | <b>0.20% (2/976)</b> | <b>98.46% (961/976)</b> | <b>1.33% (13/976)</b> |

Table 28: Weighted Results per Type and Overall (Prediction for **MedQA**), Model: **gpt-4.1**

| Type               | Weighted Redact         | Weighted Abstract       | Weighted Retain       |
|--------------------|-------------------------|-------------------------|-----------------------|
| AGE                | 57.52% (65/113)         | 41.59% (47/113)         | 0.88% (1/113)         |
| GENDER             | 74.14% (43/58)          | 22.41% (13/58)          | 3.45% (2/58)          |
| OCCUPATION         | 66.67% (6/9)            | 33.33% (3/9)            | 0.00% (0/9)           |
| HEALTH_INFORMATION | 51.82% (385/743)        | 43.47% (323/743)        | 4.71% (35/743)        |
| GEOLOCATION        | 57.89% (11/19)          | 42.11% (8/19)           | 0.00% (0/19)          |
| RACE               | 100.00% (8/8)           | 0.00% (0/8)             | 0.00% (0/8)           |
| MARITAL_STATUS     | 100.00% (1/1)           | 0.00% (0/1)             | 0.00% (0/1)           |
| TIME               | 50.00% (10/20)          | 50.00% (10/20)          | 0.00% (0/20)          |
| SEXUAL_ORIENTATION | 100.00% (3/3)           | 0.00% (0/3)             | 0.00% (0/3)           |
| AFFILIATION        | 100.00% (1/1)           | 0.00% (0/1)             | 0.00% (0/1)           |
| DIETARY_PREFERENCE | 0.00% (0/1)             | 100.00% (1/1)           | 0.00% (0/1)           |
| <b>Overall</b>     | <b>54.61% (533/976)</b> | <b>41.50% (405/976)</b> | <b>3.89% (38/976)</b> |

Table 29: Weighted Results per Type and Overall (Prediction for **MedQA**), Model: **gpt-5**

| Type               | Weighted Redact      | Weighted Abstract     | Weighted Retain         |
|--------------------|----------------------|-----------------------|-------------------------|
| AGE                | 0.00% (0/113)        | 30.09% (34/113)       | 69.91% (79/113)         |
| GENDER             | 0.00% (0/58)         | 22.41% (13/58)        | 77.59% (45/58)          |
| OCCUPATION         | 0.00% (0/9)          | 55.56% (5/9)          | 44.44% (4/9)            |
| HEALTH_INFORMATION | 0.00% (0/743)        | 2.96% (22/743)        | 97.04% (721/743)        |
| GEOLOCATION        | 0.00% (0/19)         | 52.63% (10/19)        | 47.37% (9/19)           |
| RACE               | 25.00% (2/8)         | 62.50% (5/8)          | 12.50% (1/8)            |
| MARITAL_STATUS     | 0.00% (0/1)          | 100.00% (1/1)         | 0.00% (0/1)             |
| TIME               | 0.00% (0/20)         | 20.00% (4/20)         | 80.00% (16/20)          |
| SEXUAL_ORIENTATION | 0.00% (0/3)          | 66.67% (2/3)          | 33.33% (1/3)            |
| AFFILIATION        | 0.00% (0/1)          | 100.00% (1/1)         | 0.00% (0/1)             |
| DIETARY_PREFERENCE | 0.00% (0/1)          | 0.00% (0/1)           | 100.00% (1/1)           |
| <b>Overall</b>     | <b>0.20% (2/976)</b> | <b>9.94% (97/976)</b> | <b>89.86% (877/976)</b> |

Table 30: Weighted Results per Type and Overall (Prediction for **MedQA**), Model: **claude-3-7-sonnet-20250219**

| Type               | Weighted Redact      | Weighted Abstract       | Weighted Retain         |
|--------------------|----------------------|-------------------------|-------------------------|
| AGE                | 0.00% (0/113)        | 70.80% (80/113)         | 29.20% (33/113)         |
| GENDER             | 1.72% (1/58)         | 74.14% (43/58)          | 24.14% (14/58)          |
| OCCUPATION         | 0.00% (0/9)          | 100.00% (9/9)           | 0.00% (0/9)             |
| HEALTH_INFORMATION | 0.00% (0/743)        | 15.21% (113/743)        | 84.79% (630/743)        |
| GEOLOCATION        | 5.26% (1/19)         | 63.16% (12/19)          | 31.58% (6/19)           |
| RACE               | 87.50% (7/8)         | 0.00% (0/8)             | 12.50% (1/8)            |
| MARITAL_STATUS     | 0.00% (0/1)          | 100.00% (1/1)           | 0.00% (0/1)             |
| TIME               | 0.00% (0/20)         | 40.00% (8/20)           | 60.00% (12/20)          |
| SEXUAL_ORIENTATION | 0.00% (0/3)          | 100.00% (3/3)           | 0.00% (0/3)             |
| AFFILIATION        | 0.00% (0/1)          | 100.00% (1/1)           | 0.00% (0/1)             |
| DIETARY_PREFERENCE | 0.00% (0/1)          | 0.00% (0/1)             | 100.00% (1/1)           |
| <b>Overall</b>     | <b>0.92% (9/976)</b> | <b>27.66% (270/976)</b> | <b>71.41% (697/976)</b> |

Table 31: Weighted Results per Type and Overall (Prediction for **MedQA**), Model: **claude-sonnet-4-20250514**

| Type               | Weighted Redact         | Weighted Abstract       | Weighted Retain      |
|--------------------|-------------------------|-------------------------|----------------------|
| AGE                | 84.07% (95/113)         | 15.93% (18/113)         | 0.00% (0/113)        |
| GENDER             | 82.76% (48/58)          | 15.52% (9/58)           | 1.72% (1/58)         |
| OCCUPATION         | 88.89% (8/9)            | 11.11% (1/9)            | 0.00% (0/9)          |
| HEALTH_INFORMATION | 45.76% (340/743)        | 54.10% (402/743)        | 0.13% (1/743)        |
| GEOLOCATION        | 94.74% (18/19)          | 5.26% (1/19)            | 0.00% (0/19)         |
| RACE               | 87.50% (7/8)            | 12.50% (1/8)            | 0.00% (0/8)          |
| MARITAL_STATUS     | 100.00% (1/1)           | 0.00% (0/1)             | 0.00% (0/1)          |
| TIME               | 80.00% (16/20)          | 20.00% (4/20)           | 0.00% (0/20)         |
| SEXUAL_ORIENTATION | 66.67% (2/3)            | 33.33% (1/3)            | 0.00% (0/3)          |
| AFFILIATION        | 100.00% (1/1)           | 0.00% (0/1)             | 0.00% (0/1)          |
| DIETARY_PREFERENCE | 0.00% (0/1)             | 100.00% (1/1)           | 0.00% (0/1)          |
| <b>Overall</b>     | <b>54.92% (536/976)</b> | <b>44.88% (438/976)</b> | <b>0.20% (2/976)</b> |

Table 32: Weighted Results per Type and Overall (Prediction for **MedQA**), Model: **lgai/xaone-deep-32b**

| Type               | Weighted Redact      | Weighted Abstract       | Weighted Retain       |
|--------------------|----------------------|-------------------------|-----------------------|
| AGE                | 0.00% (0/113)        | 100.00% (113/113)       | 0.00% (0/113)         |
| GENDER             | 0.00% (0/58)         | 100.00% (58/58)         | 0.00% (0/58)          |
| OCCUPATION         | 0.00% (0/9)          | 100.00% (9/9)           | 0.00% (0/9)           |
| HEALTH_INFORMATION | 0.00% (0/743)        | 91.39% (679/743)        | 8.61% (64/743)        |
| GEOLOCATION        | 0.00% (0/19)         | 100.00% (19/19)         | 0.00% (0/19)          |
| RACE               | 0.00% (0/8)          | 100.00% (8/8)           | 0.00% (0/8)           |
| MARITAL_STATUS     | 0.00% (0/1)          | 100.00% (1/1)           | 0.00% (0/1)           |
| TIME               | 0.00% (0/20)         | 100.00% (20/20)         | 0.00% (0/20)          |
| SEXUAL_ORIENTATION | 0.00% (0/3)          | 100.00% (3/3)           | 0.00% (0/3)           |
| AFFILIATION        | 0.00% (0/1)          | 100.00% (1/1)           | 0.00% (0/1)           |
| DIETARY_PREFERENCE | 0.00% (0/1)          | 100.00% (1/1)           | 0.00% (0/1)           |
| <b>Overall</b>     | <b>0.00% (0/976)</b> | <b>93.44% (912/976)</b> | <b>6.56% (64/976)</b> |

Table 33: Weighted Results per Type and Overall (Prediction for **MedQA**), Model: **mistralai/mistral-small-3.1-24b-instruct**

| Type               | Weighted Redact      | Weighted Abstract       | Weighted Retain      |
|--------------------|----------------------|-------------------------|----------------------|
| AGE                | 0.00% (0/113)        | 100.00% (113/113)       | 0.00% (0/113)        |
| GENDER             | 0.00% (0/58)         | 96.55% (56/58)          | 3.45% (2/58)         |
| OCCUPATION         | 0.00% (0/9)          | 100.00% (9/9)           | 0.00% (0/9)          |
| HEALTH_INFORMATION | 0.00% (0/743)        | 99.87% (742/743)        | 0.13% (1/743)        |
| GEOLOCATION        | 0.00% (0/19)         | 100.00% (19/19)         | 0.00% (0/19)         |
| RACE               | 0.00% (0/8)          | 100.00% (8/8)           | 0.00% (0/8)          |
| MARITAL_STATUS     | 0.00% (0/1)          | 100.00% (1/1)           | 0.00% (0/1)          |
| TIME               | 0.00% (0/20)         | 100.00% (20/20)         | 0.00% (0/20)         |
| SEXUAL_ORIENTATION | 0.00% (0/3)          | 100.00% (3/3)           | 0.00% (0/3)          |
| AFFILIATION        | 0.00% (0/1)          | 100.00% (1/1)           | 0.00% (0/1)          |
| DIETARY_PREFERENCE | 0.00% (0/1)          | 100.00% (1/1)           | 0.00% (0/1)          |
| <b>Overall</b>     | <b>0.00% (0/976)</b> | <b>99.69% (973/976)</b> | <b>0.31% (3/976)</b> |

Table 34: Weighted Results per Type and Overall (Prediction for **MedQA**), Model: **qwen/qwen2.5-7b-instruct**

## 1.3 SHAREGPT

| Type                  | Weighted Redact          | Weighted Abstract        | Weighted Retain          |
|-----------------------|--------------------------|--------------------------|--------------------------|
| NAME                  | 91.28% (157/172)         | 5.23% (9/172)            | 3.49% (6/172)            |
| AFFILIATION           | 90.64% (155/171)         | 5.26% (9/171)            | 4.09% (7/171)            |
| TIME                  | 67.05% (177/264)         | 7.58% (20/264)           | 25.38% (67/264)          |
| URL                   | 75.00% (15/20)           | 20.00% (4/20)            | 5.00% (1/20)             |
| EMAIL                 | 100.00% (4/4)            | 0.00% (0/4)              | 0.00% (0/4)              |
| GEOLOCATION           | 66.67% (218/327)         | 17.13% (56/327)          | 16.21% (53/327)          |
| RELIGION              | 0.00% (0/2)              | 50.00% (1/2)             | 50.00% (1/2)             |
| FINANCIAL_INFORMATION | 72.73% (8/11)            | 18.18% (2/11)            | 9.09% (1/11)             |
| MARITAL_STATUS        | 63.64% (7/11)            | 27.27% (3/11)            | 9.09% (1/11)             |
| OCCUPATION            | 83.33% (50/60)           | 11.67% (7/60)            | 5.00% (3/60)             |
| VEHICLE               | 0.00% (0/1)              | 100.00% (1/1)            | 0.00% (0/1)              |
| INCOME                | 87.50% (7/8)             | 12.50% (1/8)             | 0.00% (0/8)              |
| HEALTH_INFORMATION    | 65.31% (32/49)           | 16.33% (8/49)            | 18.37% (9/49)            |
| EDUCATIONAL_RECORD    | 100.00% (10/10)          | 0.00% (0/10)             | 0.00% (0/10)             |
| AGE                   | 67.86% (38/56)           | 26.79% (15/56)           | 5.36% (3/56)             |
| GENDER                | 61.54% (8/13)            | 23.08% (3/13)            | 15.38% (2/13)            |
| ETHNICITY             | 80.00% (4/5)             | 20.00% (1/5)             | 0.00% (0/5)              |
| ADDRESS               | 0.00% (0/1)              | 100.00% (1/1)            | 0.00% (0/1)              |
| IP_ADDRESS            | 66.67% (2/3)             | 0.00% (0/3)              | 33.33% (1/3)             |
| RACE                  | 50.00% (1/2)             | 50.00% (1/2)             | 0.00% (0/2)              |
| <b>Overall</b>        | <b>75.04% (893/1190)</b> | <b>11.93% (142/1190)</b> | <b>13.03% (155/1190)</b> |

Table 35: Weighted Results per Type and Overall (Oracle for **ShareGPT90K**), Model: **gpt-4.1-nano**

| Type                  | Weighted Redact          | Weighted Abstract        | Weighted Retain        |
|-----------------------|--------------------------|--------------------------|------------------------|
| NAME                  | 87.79% (151/172)         | 6.98% (12/172)           | 5.23% (9/172)          |
| AFFILIATION           | 96.49% (165/171)         | 1.75% (3/171)            | 1.75% (3/171)          |
| TIME                  | 78.03% (206/264)         | 10.61% (28/264)          | 11.36% (30/264)        |
| URL                   | 85.00% (17/20)           | 15.00% (3/20)            | 0.00% (0/20)           |
| EMAIL                 | 100.00% (4/4)            | 0.00% (0/4)              | 0.00% (0/4)            |
| GEOLOCATION           | 66.97% (219/327)         | 22.32% (73/327)          | 10.70% (35/327)        |
| RELIGION              | 50.00% (1/2)             | 50.00% (1/2)             | 0.00% (0/2)            |
| FINANCIAL_INFORMATION | 81.82% (9/11)            | 18.18% (2/11)            | 0.00% (0/11)           |
| MARITAL_STATUS        | 63.64% (7/11)            | 0.00% (0/11)             | 36.36% (4/11)          |
| OCCUPATION            | 86.67% (52/60)           | 8.33% (5/60)             | 5.00% (3/60)           |
| VEHICLE               | 0.00% (0/1)              | 100.00% (1/1)            | 0.00% (0/1)            |
| INCOME                | 100.00% (8/8)            | 0.00% (0/8)              | 0.00% (0/8)            |
| HEALTH_INFORMATION    | 81.63% (40/49)           | 10.20% (5/49)            | 8.16% (4/49)           |
| EDUCATIONAL_RECORD    | 90.00% (9/10)            | 10.00% (1/10)            | 0.00% (0/10)           |
| AGE                   | 78.57% (44/56)           | 14.29% (8/56)            | 7.14% (4/56)           |
| GENDER                | 92.31% (12/13)           | 0.00% (0/13)             | 7.69% (1/13)           |
| ETHNICITY             | 100.00% (5/5)            | 0.00% (0/5)              | 0.00% (0/5)            |
| ADDRESS               | 100.00% (1/1)            | 0.00% (0/1)              | 0.00% (0/1)            |
| IP_ADDRESS            | 66.67% (2/3)             | 0.00% (0/3)              | 33.33% (1/3)           |
| RACE                  | 100.00% (2/2)            | 0.00% (0/2)              | 0.00% (0/2)            |
| <b>Overall</b>        | <b>80.17% (954/1190)</b> | <b>11.93% (142/1190)</b> | <b>7.90% (94/1190)</b> |

Table 36: Weighted Results per Type and Overall (Oracle for **ShareGPT90K**), Model: **gpt-4.1**

| Type                  | Weighted Redact          | Weighted Abstract       | Weighted Retain        |
|-----------------------|--------------------------|-------------------------|------------------------|
| NAME                  | 93.60% (161/172)         | 5.81% (10/172)          | 0.58% (1/172)          |
| AFFILIATION           | 95.91% (164/171)         | 2.92% (5/171)           | 1.17% (2/171)          |
| TIME                  | 77.65% (205/264)         | 10.61% (28/264)         | 11.74% (31/264)        |
| URL                   | 100.00% (20/20)          | 0.00% (0/20)            | 0.00% (0/20)           |
| EMAIL                 | 100.00% (4/4)            | 0.00% (0/4)             | 0.00% (0/4)            |
| GEOLOCATION           | 68.81% (225/327)         | 18.04% (59/327)         | 13.15% (43/327)        |
| RELIGION              | 100.00% (2/2)            | 0.00% (0/2)             | 0.00% (0/2)            |
| FINANCIAL_INFORMATION | 81.82% (9/11)            | 18.18% (2/11)           | 0.00% (0/11)           |
| MARITAL_STATUS        | 90.91% (10/11)           | 0.00% (0/11)            | 9.09% (1/11)           |
| OCCUPATION            | 88.33% (53/60)           | 8.33% (5/60)            | 3.33% (2/60)           |
| VEHICLE               | 0.00% (0/1)              | 100.00% (1/1)           | 0.00% (0/1)            |
| INCOME                | 87.50% (7/8)             | 12.50% (1/8)            | 0.00% (0/8)            |
| HEALTH_INFORMATION    | 87.76% (43/49)           | 6.12% (3/49)            | 6.12% (3/49)           |
| EDUCATIONAL_RECORD    | 100.00% (10/10)          | 0.00% (0/10)            | 0.00% (0/10)           |
| AGE                   | 91.07% (51/56)           | 5.36% (3/56)            | 3.57% (2/56)           |
| GENDER                | 92.31% (12/13)           | 7.69% (1/13)            | 0.00% (0/13)           |
| ETHNICITY             | 100.00% (5/5)            | 0.00% (0/5)             | 0.00% (0/5)            |
| ADDRESS               | 100.00% (1/1)            | 0.00% (0/1)             | 0.00% (0/1)            |
| IP_ADDRESS            | 100.00% (3/3)            | 0.00% (0/3)             | 0.00% (0/3)            |
| RACE                  | 100.00% (2/2)            | 0.00% (0/2)             | 0.00% (0/2)            |
| <b>Overall</b>        | <b>82.94% (987/1190)</b> | <b>9.92% (118/1190)</b> | <b>7.14% (85/1190)</b> |

Table 37: Weighted Results per Type and Overall (Oracle for **ShareGPT90K**), Model: **gpt-5**

| Type                  | Weighted Redact          | Weighted Abstract        | Weighted Retain          |
|-----------------------|--------------------------|--------------------------|--------------------------|
| NAME                  | 80.81% (139/172)         | 9.88% (17/172)           | 9.30% (16/172)           |
| AFFILIATION           | 94.15% (161/171)         | 2.92% (5/171)            | 2.92% (5/171)            |
| TIME                  | 76.14% (201/264)         | 8.33% (22/264)           | 15.53% (41/264)          |
| URL                   | 85.00% (17/20)           | 10.00% (2/20)            | 5.00% (1/20)             |
| EMAIL                 | 100.00% (4/4)            | 0.00% (0/4)              | 0.00% (0/4)              |
| GEOLOCATION           | 63.00% (206/327)         | 18.35% (60/327)          | 18.65% (61/327)          |
| RELIGION              | 0.00% (0/2)              | 0.00% (0/2)              | 100.00% (2/2)            |
| FINANCIAL_INFORMATION | 63.64% (7/11)            | 27.27% (3/11)            | 9.09% (1/11)             |
| MARITAL_STATUS        | 81.82% (9/11)            | 18.18% (2/11)            | 0.00% (0/11)             |
| OCCUPATION            | 88.33% (53/60)           | 11.67% (7/60)            | 0.00% (0/60)             |
| VEHICLE               | 0.00% (0/1)              | 100.00% (1/1)            | 0.00% (0/1)              |
| INCOME                | 87.50% (7/8)             | 12.50% (1/8)             | 0.00% (0/8)              |
| HEALTH_INFORMATION    | 65.31% (32/49)           | 12.24% (6/49)            | 22.45% (11/49)           |
| EDUCATIONAL_RECORD    | 90.00% (9/10)            | 0.00% (0/10)             | 10.00% (1/10)            |
| AGE                   | 67.86% (38/56)           | 21.43% (12/56)           | 10.71% (6/56)            |
| GENDER                | 76.92% (10/13)           | 15.38% (2/13)            | 7.69% (1/13)             |
| ETHNICITY             | 60.00% (3/5)             | 0.00% (0/5)              | 40.00% (2/5)             |
| ADDRESS               | 100.00% (1/1)            | 0.00% (0/1)              | 0.00% (0/1)              |
| IP_ADDRESS            | 33.33% (1/3)             | 0.00% (0/3)              | 66.67% (2/3)             |
| RACE                  | 50.00% (1/2)             | 50.00% (1/2)             | 0.00% (0/2)              |
| <b>Overall</b>        | <b>75.55% (899/1190)</b> | <b>11.85% (141/1190)</b> | <b>12.61% (150/1190)</b> |

Table 38: Weighted Results per Type and Overall (Oracle for **ShareGPT90K**), Model: **claude-3-7-sonnet-20250219**

| Type                  | Weighted Redact          | Weighted Abstract        | Weighted Retain          |
|-----------------------|--------------------------|--------------------------|--------------------------|
| NAME                  | 82.56% (142/172)         | 6.40% (11/172)           | 11.05% (19/172)          |
| AFFILIATION           | 91.23% (156/171)         | 7.60% (13/171)           | 1.17% (2/171)            |
| TIME                  | 61.74% (163/264)         | 14.39% (38/264)          | 23.86% (63/264)          |
| URL                   | 75.00% (15/20)           | 15.00% (3/20)            | 10.00% (2/20)            |
| EMAIL                 | 100.00% (4/4)            | 0.00% (0/4)              | 0.00% (0/4)              |
| GEOLOCATION           | 58.41% (191/327)         | 17.13% (56/327)          | 24.46% (80/327)          |
| RELIGION              | 100.00% (2/2)            | 0.00% (0/2)              | 0.00% (0/2)              |
| FINANCIAL_INFORMATION | 63.64% (7/11)            | 36.36% (4/11)            | 0.00% (0/11)             |
| MARITAL_STATUS        | 81.82% (9/11)            | 9.09% (1/11)             | 9.09% (1/11)             |
| OCCUPATION            | 80.00% (48/60)           | 16.67% (10/60)           | 3.33% (2/60)             |
| VEHICLE               | 100.00% (1/1)            | 0.00% (0/1)              | 0.00% (0/1)              |
| INCOME                | 75.00% (6/8)             | 12.50% (1/8)             | 12.50% (1/8)             |
| HEALTH_INFORMATION    | 65.31% (32/49)           | 12.24% (6/49)            | 22.45% (11/49)           |
| EDUCATIONAL_RECORD    | 90.00% (9/10)            | 0.00% (0/10)             | 10.00% (1/10)            |
| AGE                   | 66.07% (37/56)           | 12.50% (7/56)            | 21.43% (12/56)           |
| GENDER                | 69.23% (9/13)            | 7.69% (1/13)             | 23.08% (3/13)            |
| ETHNICITY             | 60.00% (3/5)             | 40.00% (2/5)             | 0.00% (0/5)              |
| ADDRESS               | 100.00% (1/1)            | 0.00% (0/1)              | 0.00% (0/1)              |
| IP_ADDRESS            | 0.00% (0/3)              | 0.00% (0/3)              | 100.00% (3/3)            |
| RACE                  | 50.00% (1/2)             | 0.00% (0/2)              | 50.00% (1/2)             |
| <b>Overall</b>        | <b>70.25% (836/1190)</b> | <b>12.86% (153/1190)</b> | <b>16.89% (201/1190)</b> |

Table 39: Weighted Results per Type and Overall (Oracle for **ShareGPT90K**), Model: **claude-sonnet-4-20250514**

| Type                  | Weighted Redact          | Weighted Abstract        | Weighted Retain          |
|-----------------------|--------------------------|--------------------------|--------------------------|
| NAME                  | 56.40% (97/172)          | 18.02% (31/172)          | 25.58% (44/172)          |
| AFFILIATION           | 72.51% (124/171)         | 14.62% (25/171)          | 12.87% (22/171)          |
| TIME                  | 46.21% (122/264)         | 28.79% (76/264)          | 25.00% (66/264)          |
| URL                   | 60.00% (12/20)           | 25.00% (5/20)            | 15.00% (3/20)            |
| EMAIL                 | 75.00% (3/4)             | 0.00% (0/4)              | 25.00% (1/4)             |
| GEOLOCATION           | 45.57% (149/327)         | 18.04% (59/327)          | 36.39% (119/327)         |
| RELIGION              | 0.00% (0/2)              | 100.00% (2/2)            | 0.00% (0/2)              |
| FINANCIAL_INFORMATION | 36.36% (4/11)            | 27.27% (3/11)            | 36.36% (4/11)            |
| MARITAL_STATUS        | 36.36% (4/11)            | 18.18% (2/11)            | 45.45% (5/11)            |
| OCCUPATION            | 70.00% (42/60)           | 6.67% (4/60)             | 23.33% (14/60)           |
| VEHICLE               | 0.00% (0/1)              | 0.00% (0/1)              | 100.00% (1/1)            |
| INCOME                | 87.50% (7/8)             | 12.50% (1/8)             | 0.00% (0/8)              |
| HEALTH_INFORMATION    | 63.27% (31/49)           | 10.20% (5/49)            | 26.53% (13/49)           |
| EDUCATIONAL_RECORD    | 80.00% (8/10)            | 0.00% (0/10)             | 20.00% (2/10)            |
| AGE                   | 48.21% (27/56)           | 30.36% (17/56)           | 21.43% (12/56)           |
| GENDER                | 76.92% (10/13)           | 0.00% (0/13)             | 23.08% (3/13)            |
| ETHNICITY             | 60.00% (3/5)             | 20.00% (1/5)             | 20.00% (1/5)             |
| ADDRESS               | 100.00% (1/1)            | 0.00% (0/1)              | 0.00% (0/1)              |
| IP_ADDRESS            | 33.33% (1/3)             | 0.00% (0/3)              | 66.67% (2/3)             |
| RACE                  | 50.00% (1/2)             | 0.00% (0/2)              | 50.00% (1/2)             |
| <b>Overall</b>        | <b>54.29% (646/1190)</b> | <b>19.41% (231/1190)</b> | <b>26.30% (313/1190)</b> |

Table 40: Weighted Results per Type and Overall (Oracle for **ShareGPT90K**), Model: **lgai/xaone-deep-32b**

| Type                  | Weighted Redact          | Weighted Abstract        | Weighted Retain          |
|-----------------------|--------------------------|--------------------------|--------------------------|
| NAME                  | 79.07% (136/172)         | 6.98% (12/172)           | 13.95% (24/172)          |
| AFFILIATION           | 89.47% (153/171)         | 7.02% (12/171)           | 3.51% (6/171)            |
| TIME                  | 60.98% (161/264)         | 19.70% (52/264)          | 19.32% (51/264)          |
| URL                   | 95.00% (19/20)           | 0.00% (0/20)             | 5.00% (1/20)             |
| EMAIL                 | 100.00% (4/4)            | 0.00% (0/4)              | 0.00% (0/4)              |
| GEOLOCATION           | 55.05% (180/327)         | 22.32% (73/327)          | 22.63% (74/327)          |
| RELIGION              | 100.00% (2/2)            | 0.00% (0/2)              | 0.00% (0/2)              |
| FINANCIAL_INFORMATION | 54.55% (6/11)            | 18.18% (2/11)            | 27.27% (3/11)            |
| MARITAL_STATUS        | 63.64% (7/11)            | 18.18% (2/11)            | 18.18% (2/11)            |
| OCCUPATION            | 86.67% (52/60)           | 10.00% (6/60)            | 3.33% (2/60)             |
| VEHICLE               | 0.00% (0/1)              | 0.00% (0/1)              | 100.00% (1/1)            |
| INCOME                | 87.50% (7/8)             | 12.50% (1/8)             | 0.00% (0/8)              |
| HEALTH_INFORMATION    | 63.27% (31/49)           | 22.45% (11/49)           | 14.29% (7/49)            |
| EDUCATIONAL_RECORD    | 90.00% (9/10)            | 10.00% (1/10)            | 0.00% (0/10)             |
| AGE                   | 62.50% (35/56)           | 19.64% (11/56)           | 17.86% (10/56)           |
| GENDER                | 61.54% (8/13)            | 15.38% (2/13)            | 23.08% (3/13)            |
| ETHNICITY             | 60.00% (3/5)             | 40.00% (2/5)             | 0.00% (0/5)              |
| ADDRESS               | 100.00% (1/1)            | 0.00% (0/1)              | 0.00% (0/1)              |
| IP_ADDRESS            | 0.00% (0/3)              | 66.67% (2/3)             | 33.33% (1/3)             |
| RACE                  | 0.00% (0/2)              | 50.00% (1/2)             | 50.00% (1/2)             |
| <b>Overall</b>        | <b>68.40% (814/1190)</b> | <b>15.97% (190/1190)</b> | <b>15.63% (186/1190)</b> |

Table 41: Weighted Results per Type and Overall (Oracle for **ShareGPT90K**), Model: **mistralai/mistral-small-3.1-24b-instruct**

| Type                  | Weighted Redact          | Weighted Abstract        | Weighted Retain          |
|-----------------------|--------------------------|--------------------------|--------------------------|
| NAME                  | 75.00% (129/172)         | 9.88% (17/172)           | 15.12% (26/172)          |
| AFFILIATION           | 81.87% (140/171)         | 11.70% (20/171)          | 6.43% (11/171)           |
| TIME                  | 52.65% (139/264)         | 15.53% (41/264)          | 31.82% (84/264)          |
| URL                   | 80.00% (16/20)           | 15.00% (3/20)            | 5.00% (1/20)             |
| EMAIL                 | 100.00% (4/4)            | 0.00% (0/4)              | 0.00% (0/4)              |
| GEOLOCATION           | 53.21% (174/327)         | 18.96% (62/327)          | 27.83% (91/327)          |
| RELIGION              | 100.00% (2/2)            | 0.00% (0/2)              | 0.00% (0/2)              |
| FINANCIAL_INFORMATION | 54.55% (6/11)            | 9.09% (1/11)             | 36.36% (4/11)            |
| MARITAL_STATUS        | 54.55% (6/11)            | 9.09% (1/11)             | 36.36% (4/11)            |
| OCCUPATION            | 65.00% (39/60)           | 15.00% (9/60)            | 20.00% (12/60)           |
| VEHICLE               | 100.00% (1/1)            | 0.00% (0/1)              | 0.00% (0/1)              |
| INCOME                | 100.00% (8/8)            | 0.00% (0/8)              | 0.00% (0/8)              |
| HEALTH_INFORMATION    | 61.22% (30/49)           | 12.24% (6/49)            | 26.53% (13/49)           |
| EDUCATIONAL_RECORD    | 90.00% (9/10)            | 0.00% (0/10)             | 10.00% (1/10)            |
| AGE                   | 53.57% (30/56)           | 23.21% (13/56)           | 23.21% (13/56)           |
| GENDER                | 69.23% (9/13)            | 7.69% (1/13)             | 23.08% (3/13)            |
| ETHNICITY             | 60.00% (3/5)             | 20.00% (1/5)             | 20.00% (1/5)             |
| ADDRESS               | 100.00% (1/1)            | 0.00% (0/1)              | 0.00% (0/1)              |
| IP_ADDRESS            | 33.33% (1/3)             | 33.33% (1/3)             | 33.33% (1/3)             |
| RACE                  | 50.00% (1/2)             | 0.00% (0/2)              | 50.00% (1/2)             |
| <b>Overall</b>        | <b>62.86% (748/1190)</b> | <b>14.79% (176/1190)</b> | <b>22.35% (266/1190)</b> |

Table 42: Weighted Results per Type and Overall (Oracle for **ShareGPT90K**), Model: **qwen/qwen2.5-7b-instruct**

| Type                  | Weighted Redact          | Weighted Abstract      | Weighted Retain          |
|-----------------------|--------------------------|------------------------|--------------------------|
| NAME                  | 17.44% (30/172)          | 8.14% (14/172)         | 74.42% (128/172)         |
| AFFILIATION           | 18.71% (32/171)          | 14.04% (24/171)        | 67.25% (115/171)         |
| TIME                  | 10.23% (27/264)          | 6.44% (17/264)         | 83.33% (220/264)         |
| URL                   | 30.00% (6/20)            | 0.00% (0/20)           | 70.00% (14/20)           |
| EMAIL                 | 0.00% (0/4)              | 25.00% (1/4)           | 75.00% (3/4)             |
| GEOLOCATION           | 8.26% (27/327)           | 6.42% (21/327)         | 85.32% (279/327)         |
| RELIGION              | 0.00% (0/2)              | 0.00% (0/2)            | 100.00% (2/2)            |
| FINANCIAL_INFORMATION | 9.09% (1/11)             | 0.00% (0/11)           | 90.91% (10/11)           |
| MARITAL_STATUS        | 9.09% (1/11)             | 9.09% (1/11)           | 81.82% (9/11)            |
| OCCUPATION            | 6.67% (4/60)             | 3.33% (2/60)           | 90.00% (54/60)           |
| VEHICLE               | 0.00% (0/1)              | 0.00% (0/1)            | 100.00% (1/1)            |
| INCOME                | 0.00% (0/8)              | 0.00% (0/8)            | 100.00% (8/8)            |
| HEALTH_INFORMATION    | 22.45% (11/49)           | 12.24% (6/49)          | 65.31% (32/49)           |
| EDUCATIONAL_RECORD    | 50.00% (5/10)            | 10.00% (1/10)          | 40.00% (4/10)            |
| AGE                   | 10.71% (6/56)            | 8.93% (5/56)           | 80.36% (45/56)           |
| GENDER                | 7.69% (1/13)             | 7.69% (1/13)           | 84.62% (11/13)           |
| ETHNICITY             | 0.00% (0/5)              | 20.00% (1/5)           | 80.00% (4/5)             |
| ADDRESS               | 0.00% (0/1)              | 0.00% (0/1)            | 100.00% (1/1)            |
| IP_ADDRESS            | 0.00% (0/3)              | 0.00% (0/3)            | 100.00% (3/3)            |
| RACE                  | 50.00% (1/2)             | 0.00% (0/2)            | 50.00% (1/2)             |
| <b>Overall</b>        | <b>12.77% (152/1190)</b> | <b>7.90% (94/1190)</b> | <b>79.33% (944/1190)</b> |

Table 43: Weighted Results per Type and Overall (Oracle for **ShareGPT90K**), Model: **qwen/qwen2.5-0.5b-instruct**

| Type                  | Weighted Redact          | Weighted Abstract        | Weighted Retain        |
|-----------------------|--------------------------|--------------------------|------------------------|
| NAME                  | 69.77% (120/172)         | 29.07% (50/172)          | 1.16% (2/172)          |
| AFFILIATION           | 53.80% (92/171)          | 45.03% (77/171)          | 1.17% (2/171)          |
| TIME                  | 45.83% (121/264)         | 53.41% (141/264)         | 0.76% (2/264)          |
| URL                   | 75.00% (15/20)           | 25.00% (5/20)            | 0.00% (0/20)           |
| EMAIL                 | 100.00% (4/4)            | 0.00% (0/4)              | 0.00% (0/4)            |
| GEOLOCATION           | 42.51% (139/327)         | 57.49% (188/327)         | 0.00% (0/327)          |
| RELIGION              | 100.00% (2/2)            | 0.00% (0/2)              | 0.00% (0/2)            |
| FINANCIAL_INFORMATION | 81.82% (9/11)            | 18.18% (2/11)            | 0.00% (0/11)           |
| MARITAL_STATUS        | 63.64% (7/11)            | 36.36% (4/11)            | 0.00% (0/11)           |
| OCCUPATION            | 71.67% (43/60)           | 21.67% (13/60)           | 6.67% (4/60)           |
| VEHICLE               | 0.00% (0/1)              | 100.00% (1/1)            | 0.00% (0/1)            |
| INCOME                | 62.50% (5/8)             | 37.50% (3/8)             | 0.00% (0/8)            |
| HEALTH_INFORMATION    | 34.69% (17/49)           | 65.31% (32/49)           | 0.00% (0/49)           |
| EDUCATIONAL_RECORD    | 20.00% (2/10)            | 80.00% (8/10)            | 0.00% (0/10)           |
| AGE                   | 53.57% (30/56)           | 46.43% (26/56)           | 0.00% (0/56)           |
| GENDER                | 38.46% (5/13)            | 61.54% (8/13)            | 0.00% (0/13)           |
| ETHNICITY             | 80.00% (4/5)             | 20.00% (1/5)             | 0.00% (0/5)            |
| ADDRESS               | 0.00% (0/1)              | 100.00% (1/1)            | 0.00% (0/1)            |
| IP_ADDRESS            | 0.00% (0/3)              | 100.00% (3/3)            | 0.00% (0/3)            |
| RACE                  | 0.00% (0/2)              | 100.00% (2/2)            | 0.00% (0/2)            |
| <b>Overall</b>        | <b>51.68% (615/1190)</b> | <b>47.48% (565/1190)</b> | <b>0.84% (10/1190)</b> |

Table 44: Weighted Results per Type and Overall (Prediction for **ShareGPT90K**), Model: **gpt-4.1-nano**

| Type                  | Weighted Redact       | Weighted Abstract         | Weighted Retain        |
|-----------------------|-----------------------|---------------------------|------------------------|
| NAME                  | 1.74% (3/172)         | 97.67% (168/172)          | 0.58% (1/172)          |
| AFFILIATION           | 0.00% (0/171)         | 98.83% (169/171)          | 1.17% (2/171)          |
| TIME                  | 0.00% (0/264)         | 100.00% (264/264)         | 0.00% (0/264)          |
| URL                   | 0.00% (0/20)          | 100.00% (20/20)           | 0.00% (0/20)           |
| EMAIL                 | 0.00% (0/4)           | 100.00% (4/4)             | 0.00% (0/4)            |
| GEOLOCATION           | 0.00% (0/327)         | 91.13% (298/327)          | 8.87% (29/327)         |
| RELIGION              | 0.00% (0/2)           | 100.00% (2/2)             | 0.00% (0/2)            |
| FINANCIAL_INFORMATION | 0.00% (0/11)          | 100.00% (11/11)           | 0.00% (0/11)           |
| MARITAL_STATUS        | 0.00% (0/11)          | 100.00% (11/11)           | 0.00% (0/11)           |
| OCCUPATION            | 0.00% (0/60)          | 96.67% (58/60)            | 3.33% (2/60)           |
| VEHICLE               | 0.00% (0/1)           | 100.00% (1/1)             | 0.00% (0/1)            |
| INCOME                | 0.00% (0/8)           | 100.00% (8/8)             | 0.00% (0/8)            |
| HEALTH_INFORMATION    | 0.00% (0/49)          | 79.59% (39/49)            | 20.41% (10/49)         |
| EDUCATIONAL_RECORD    | 0.00% (0/10)          | 100.00% (10/10)           | 0.00% (0/10)           |
| AGE                   | 0.00% (0/56)          | 100.00% (56/56)           | 0.00% (0/56)           |
| GENDER                | 0.00% (0/13)          | 100.00% (13/13)           | 0.00% (0/13)           |
| ETHNICITY             | 0.00% (0/5)           | 100.00% (5/5)             | 0.00% (0/5)            |
| ADDRESS               | 0.00% (0/1)           | 100.00% (1/1)             | 0.00% (0/1)            |
| IP_ADDRESS            | 0.00% (0/3)           | 100.00% (3/3)             | 0.00% (0/3)            |
| RACE                  | 0.00% (0/2)           | 100.00% (2/2)             | 0.00% (0/2)            |
| <b>Overall</b>        | <b>0.25% (3/1190)</b> | <b>96.05% (1143/1190)</b> | <b>3.70% (44/1190)</b> |

Table 45: Weighted Results per Type and Overall (Prediction for **ShareGPT90K**), Model: **gpt-4.1**

| Type                  | Weighted Redact          | Weighted Abstract        | Weighted Retain          |
|-----------------------|--------------------------|--------------------------|--------------------------|
| NAME                  | 28.49% (49/172)          | 62.21% (107/172)         | 9.30% (16/172)           |
| AFFILIATION           | 11.70% (20/171)          | 64.91% (111/171)         | 23.39% (40/171)          |
| TIME                  | 8.71% (23/264)           | 55.68% (147/264)         | 35.61% (94/264)          |
| URL                   | 30.00% (6/20)            | 30.00% (6/20)            | 40.00% (8/20)            |
| EMAIL                 | 75.00% (3/4)             | 0.00% (0/4)              | 25.00% (1/4)             |
| GEOLOCATION           | 6.73% (22/327)           | 41.59% (136/327)         | 51.68% (169/327)         |
| RELIGION              | 50.00% (1/2)             | 0.00% (0/2)              | 50.00% (1/2)             |
| FINANCIAL_INFORMATION | 0.00% (0/11)             | 54.55% (6/11)            | 45.45% (5/11)            |
| MARITAL_STATUS        | 18.18% (2/11)            | 81.82% (9/11)            | 0.00% (0/11)             |
| OCCUPATION            | 1.67% (1/60)             | 75.00% (45/60)           | 23.33% (14/60)           |
| VEHICLE               | 0.00% (0/1)              | 0.00% (0/1)              | 100.00% (1/1)            |
| INCOME                | 0.00% (0/8)              | 62.50% (5/8)             | 37.50% (3/8)             |
| HEALTH_INFORMATION    | 28.57% (14/49)           | 63.27% (31/49)           | 8.16% (4/49)             |
| EDUCATIONAL_RECORD    | 0.00% (0/10)             | 100.00% (10/10)          | 0.00% (0/10)             |
| AGE                   | 23.21% (13/56)           | 67.86% (38/56)           | 8.93% (5/56)             |
| GENDER                | 46.15% (6/13)            | 46.15% (6/13)            | 7.69% (1/13)             |
| ETHNICITY             | 40.00% (2/5)             | 40.00% (2/5)             | 20.00% (1/5)             |
| ADDRESS               | 100.00% (1/1)            | 0.00% (0/1)              | 0.00% (0/1)              |
| IP_ADDRESS            | 0.00% (0/3)              | 100.00% (3/3)            | 0.00% (0/3)              |
| RACE                  | 50.00% (1/2)             | 50.00% (1/2)             | 0.00% (0/2)              |
| <b>Overall</b>        | <b>13.78% (164/1190)</b> | <b>55.71% (663/1190)</b> | <b>30.50% (363/1190)</b> |

Table 46: Weighted Results per Type and Overall (Prediction for **ShareGPT90K**), Model: **gpt-5**

| Type                  | Weighted Redact        | Weighted Abstract        | Weighted Retain          |
|-----------------------|------------------------|--------------------------|--------------------------|
| NAME                  | 2.91% (5/172)          | 76.74% (132/172)         | 20.35% (35/172)          |
| AFFILIATION           | 3.51% (6/171)          | 34.50% (59/171)          | 61.99% (106/171)         |
| TIME                  | 1.14% (3/264)          | 20.45% (54/264)          | 78.41% (207/264)         |
| URL                   | 40.00% (8/20)          | 25.00% (5/20)            | 35.00% (7/20)            |
| EMAIL                 | 0.00% (0/4)            | 75.00% (3/4)             | 25.00% (1/4)             |
| GEOLOCATION           | 0.92% (3/327)          | 22.63% (74/327)          | 76.45% (250/327)         |
| RELIGION              | 0.00% (0/2)            | 100.00% (2/2)            | 0.00% (0/2)              |
| FINANCIAL_INFORMATION | 0.00% (0/11)           | 54.55% (6/11)            | 45.45% (5/11)            |
| MARITAL_STATUS        | 0.00% (0/11)           | 81.82% (9/11)            | 18.18% (2/11)            |
| OCCUPATION            | 0.00% (0/60)           | 11.67% (7/60)            | 88.33% (53/60)           |
| VEHICLE               | 0.00% (0/1)            | 100.00% (1/1)            | 0.00% (0/1)              |
| INCOME                | 0.00% (0/8)            | 75.00% (6/8)             | 25.00% (2/8)             |
| HEALTH_INFORMATION    | 0.00% (0/49)           | 20.41% (10/49)           | 79.59% (39/49)           |
| EDUCATIONAL_RECORD    | 0.00% (0/10)           | 30.00% (3/10)            | 70.00% (7/10)            |
| AGE                   | 5.36% (3/56)           | 51.79% (29/56)           | 42.86% (24/56)           |
| GENDER                | 0.00% (0/13)           | 38.46% (5/13)            | 61.54% (8/13)            |
| ETHNICITY             | 20.00% (1/5)           | 60.00% (3/5)             | 20.00% (1/5)             |
| ADDRESS               | 0.00% (0/1)            | 100.00% (1/1)            | 0.00% (0/1)              |
| IP_ADDRESS            | 0.00% (0/3)            | 0.00% (0/3)              | 100.00% (3/3)            |
| RACE                  | 0.00% (0/2)            | 50.00% (1/2)             | 50.00% (1/2)             |
| <b>Overall</b>        | <b>2.44% (29/1190)</b> | <b>34.45% (410/1190)</b> | <b>63.11% (751/1190)</b> |

Table 47: Weighted Results per Type and Overall (Prediction for **ShareGPT90K**), Model: **claude-3-7-sonnet-20250219**

| Type                  | Weighted Redact        | Weighted Abstract        | Weighted Retain          |
|-----------------------|------------------------|--------------------------|--------------------------|
| NAME                  | 2.33% (4/172)          | 85.47% (147/172)         | 12.21% (21/172)          |
| AFFILIATION           | 0.00% (0/171)          | 57.89% (99/171)          | 42.11% (72/171)          |
| TIME                  | 0.38% (1/264)          | 48.48% (128/264)         | 51.14% (135/264)         |
| URL                   | 0.00% (0/20)           | 70.00% (14/20)           | 30.00% (6/20)            |
| EMAIL                 | 0.00% (0/4)            | 75.00% (3/4)             | 25.00% (1/4)             |
| GEOLOCATION           | 0.00% (0/327)          | 35.78% (117/327)         | 64.22% (210/327)         |
| RELIGION              | 0.00% (0/2)            | 0.00% (0/2)              | 100.00% (2/2)            |
| FINANCIAL_INFORMATION | 0.00% (0/11)           | 45.45% (5/11)            | 54.55% (6/11)            |
| MARITAL_STATUS        | 0.00% (0/11)           | 100.00% (11/11)          | 0.00% (0/11)             |
| OCCUPATION            | 0.00% (0/60)           | 45.00% (27/60)           | 55.00% (33/60)           |
| VEHICLE               | 0.00% (0/1)            | 100.00% (1/1)            | 0.00% (0/1)              |
| INCOME                | 0.00% (0/8)            | 100.00% (8/8)            | 0.00% (0/8)              |
| HEALTH_INFORMATION    | 0.00% (0/49)           | 20.41% (10/49)           | 79.59% (39/49)           |
| EDUCATIONAL_RECORD    | 0.00% (0/10)           | 100.00% (10/10)          | 0.00% (0/10)             |
| AGE                   | 10.71% (6/56)          | 78.57% (44/56)           | 10.71% (6/56)            |
| GENDER                | 7.69% (1/13)           | 92.31% (12/13)           | 0.00% (0/13)             |
| ETHNICITY             | 20.00% (1/5)           | 80.00% (4/5)             | 0.00% (0/5)              |
| ADDRESS               | 0.00% (0/1)            | 100.00% (1/1)            | 0.00% (0/1)              |
| IP_ADDRESS            | 0.00% (0/3)            | 100.00% (3/3)            | 0.00% (0/3)              |
| RACE                  | 50.00% (1/2)           | 50.00% (1/2)             | 0.00% (0/2)              |
| <b>Overall</b>        | <b>1.18% (14/1190)</b> | <b>54.20% (645/1190)</b> | <b>44.62% (531/1190)</b> |

Table 48: Weighted Results per Type and Overall (Prediction for **ShareGPT90K**), Model: **claude-sonnet-4-20250514**

| Type                  | Weighted Redact          | Weighted Abstract        | Weighted Retain        |
|-----------------------|--------------------------|--------------------------|------------------------|
| NAME                  | 34.88% (60/172)          | 65.12% (112/172)         | 0.00% (0/172)          |
| AFFILIATION           | 26.32% (45/171)          | 72.51% (124/171)         | 1.17% (2/171)          |
| TIME                  | 14.77% (39/264)          | 81.82% (216/264)         | 3.41% (9/264)          |
| URL                   | 25.00% (5/20)            | 75.00% (15/20)           | 0.00% (0/20)           |
| EMAIL                 | 75.00% (3/4)             | 25.00% (1/4)             | 0.00% (0/4)            |
| GEOLOCATION           | 15.60% (51/327)          | 81.65% (267/327)         | 2.75% (9/327)          |
| RELIGION              | 0.00% (0/2)              | 100.00% (2/2)            | 0.00% (0/2)            |
| FINANCIAL_INFORMATION | 9.09% (1/11)             | 90.91% (10/11)           | 0.00% (0/11)           |
| MARITAL_STATUS        | 0.00% (0/11)             | 100.00% (11/11)          | 0.00% (0/11)           |
| OCCUPATION            | 28.33% (17/60)           | 71.67% (43/60)           | 0.00% (0/60)           |
| VEHICLE               | 0.00% (0/1)              | 100.00% (1/1)            | 0.00% (0/1)            |
| INCOME                | 25.00% (2/8)             | 75.00% (6/8)             | 0.00% (0/8)            |
| HEALTH_INFORMATION    | 18.37% (9/49)            | 81.63% (40/49)           | 0.00% (0/49)           |
| EDUCATIONAL_RECORD    | 20.00% (2/10)            | 80.00% (8/10)            | 0.00% (0/10)           |
| AGE                   | 23.21% (13/56)           | 67.86% (38/56)           | 8.93% (5/56)           |
| GENDER                | 46.15% (6/13)            | 53.85% (7/13)            | 0.00% (0/13)           |
| ETHNICITY             | 0.00% (0/5)              | 100.00% (5/5)            | 0.00% (0/5)            |
| ADDRESS               | 100.00% (1/1)            | 0.00% (0/1)              | 0.00% (0/1)            |
| IP_ADDRESS            | 100.00% (3/3)            | 0.00% (0/3)              | 0.00% (0/3)            |
| RACE                  | 100.00% (2/2)            | 0.00% (0/2)              | 0.00% (0/2)            |
| <b>Overall</b>        | <b>21.76% (259/1190)</b> | <b>76.13% (906/1190)</b> | <b>2.10% (25/1190)</b> |

Table 49: Weighted Results per Type and Overall (Prediction for **ShareGPT90K**), Model: **lgai/xaone-deep-32b**

| Type                  | Weighted Redact       | Weighted Abstract         | Weighted Retain        |
|-----------------------|-----------------------|---------------------------|------------------------|
| NAME                  | 0.58% (1/172)         | 98.84% (170/172)          | 0.58% (1/172)          |
| AFFILIATION           | 0.00% (0/171)         | 98.25% (168/171)          | 1.75% (3/171)          |
| TIME                  | 0.00% (0/264)         | 98.11% (259/264)          | 1.89% (5/264)          |
| URL                   | 15.00% (3/20)         | 75.00% (15/20)            | 10.00% (2/20)          |
| EMAIL                 | 0.00% (0/4)           | 100.00% (4/4)             | 0.00% (0/4)            |
| GEOLOCATION           | 0.31% (1/327)         | 97.55% (319/327)          | 2.14% (7/327)          |
| RELIGION              | 0.00% (0/2)           | 50.00% (1/2)              | 50.00% (1/2)           |
| FINANCIAL_INFORMATION | 9.09% (1/11)          | 81.82% (9/11)             | 9.09% (1/11)           |
| MARITAL_STATUS        | 0.00% (0/11)          | 100.00% (11/11)           | 0.00% (0/11)           |
| OCCUPATION            | 0.00% (0/60)          | 98.33% (59/60)            | 1.67% (1/60)           |
| VEHICLE               | 0.00% (0/1)           | 100.00% (1/1)             | 0.00% (0/1)            |
| INCOME                | 0.00% (0/8)           | 100.00% (8/8)             | 0.00% (0/8)            |
| HEALTH_INFORMATION    | 0.00% (0/49)          | 87.76% (43/49)            | 12.24% (6/49)          |
| EDUCATIONAL_RECORD    | 0.00% (0/10)          | 80.00% (8/10)             | 20.00% (2/10)          |
| AGE                   | 0.00% (0/56)          | 100.00% (56/56)           | 0.00% (0/56)           |
| GENDER                | 0.00% (0/13)          | 100.00% (13/13)           | 0.00% (0/13)           |
| ETHNICITY             | 0.00% (0/5)           | 100.00% (5/5)             | 0.00% (0/5)            |
| ADDRESS               | 0.00% (0/1)           | 100.00% (1/1)             | 0.00% (0/1)            |
| IP_ADDRESS            | 0.00% (0/3)           | 100.00% (3/3)             | 0.00% (0/3)            |
| RACE                  | 0.00% (0/2)           | 100.00% (2/2)             | 0.00% (0/2)            |
| <b>Overall</b>        | <b>0.50% (6/1190)</b> | <b>97.06% (1155/1190)</b> | <b>2.44% (29/1190)</b> |

Table 50: Weighted Results per Type and Overall (Prediction for **ShareGPT90K**), Model: **mistralai/mistral-small-3.1-24b-instruct**

| Type                  | Weighted Redact        | Weighted Abstract         | Weighted Retain       |
|-----------------------|------------------------|---------------------------|-----------------------|
| NAME                  | 0.58% (1/172)          | 99.42% (171/172)          | 0.00% (0/172)         |
| AFFILIATION           | 1.17% (2/171)          | 98.83% (169/171)          | 0.00% (0/171)         |
| TIME                  | 1.14% (3/264)          | 98.86% (261/264)          | 0.00% (0/264)         |
| URL                   | 10.00% (2/20)          | 90.00% (18/20)            | 0.00% (0/20)          |
| EMAIL                 | 75.00% (3/4)           | 25.00% (1/4)              | 0.00% (0/4)           |
| GEOLOCATION           | 0.61% (2/327)          | 99.39% (325/327)          | 0.00% (0/327)         |
| RELIGION              | 0.00% (0/2)            | 100.00% (2/2)             | 0.00% (0/2)           |
| FINANCIAL_INFORMATION | 18.18% (2/11)          | 81.82% (9/11)             | 0.00% (0/11)          |
| MARITAL_STATUS        | 9.09% (1/11)           | 90.91% (10/11)            | 0.00% (0/11)          |
| OCCUPATION            | 0.00% (0/60)           | 100.00% (60/60)           | 0.00% (0/60)          |
| VEHICLE               | 0.00% (0/1)            | 100.00% (1/1)             | 0.00% (0/1)           |
| INCOME                | 0.00% (0/8)            | 100.00% (8/8)             | 0.00% (0/8)           |
| HEALTH_INFORMATION    | 0.00% (0/49)           | 100.00% (49/49)           | 0.00% (0/49)          |
| EDUCATIONAL_RECORD    | 0.00% (0/10)           | 100.00% (10/10)           | 0.00% (0/10)          |
| AGE                   | 0.00% (0/56)           | 100.00% (56/56)           | 0.00% (0/56)          |
| GENDER                | 0.00% (0/13)           | 100.00% (13/13)           | 0.00% (0/13)          |
| ETHNICITY             | 0.00% (0/5)            | 100.00% (5/5)             | 0.00% (0/5)           |
| ADDRESS               | 0.00% (0/1)            | 100.00% (1/1)             | 0.00% (0/1)           |
| IP_ADDRESS            | 0.00% (0/3)            | 100.00% (3/3)             | 0.00% (0/3)           |
| RACE                  | 0.00% (0/2)            | 100.00% (2/2)             | 0.00% (0/2)           |
| <b>Overall</b>        | <b>1.34% (16/1190)</b> | <b>98.66% (1174/1190)</b> | <b>0.00% (0/1190)</b> |

Table 51: Weighted Results per Type and Overall (Prediction for **ShareGPT90K**), Model: **qwen/qwen2.5-7b-instruct**

## 1.4 WILDCHAT

| Type                  | Weighted Redact         | Weighted Abstract     | Weighted Retain       |
|-----------------------|-------------------------|-----------------------|-----------------------|
| NAME                  | 88.82% (135/152)        | 3.95% (6/152)         | 7.24% (11/152)        |
| AFFILIATION           | 90.91% (130/143)        | 6.99% (10/143)        | 2.10% (3/143)         |
| GEOLOCATION           | 84.39% (200/237)        | 6.75% (16/237)        | 8.86% (21/237)        |
| USERNAME              | 100.00% (2/2)           | 0.00% (0/2)           | 0.00% (0/2)           |
| TIME                  | 85.23% (127/149)        | 8.05% (12/149)        | 6.71% (10/149)        |
| AGE                   | 63.64% (14/22)          | 18.18% (4/22)         | 18.18% (4/22)         |
| OCCUPATION            | 81.08% (30/37)          | 10.81% (4/37)         | 8.11% (3/37)          |
| QUANTITY              | 100.00% (6/6)           | 0.00% (0/6)           | 0.00% (0/6)           |
| ETHNICITY             | 77.78% (7/9)            | 11.11% (1/9)          | 11.11% (1/9)          |
| GENDER                | 85.71% (6/7)            | 14.29% (1/7)          | 0.00% (0/7)           |
| EMAIL                 | 100.00% (2/2)           | 0.00% (0/2)           | 0.00% (0/2)           |
| URL                   | 100.00% (8/8)           | 0.00% (0/8)           | 0.00% (0/8)           |
| HEALTH_INFORMATION    | 50.00% (3/6)            | 33.33% (2/6)          | 16.67% (1/6)          |
| RACE                  | 100.00% (1/1)           | 0.00% (0/1)           | 0.00% (0/1)           |
| INCOME                | 85.71% (12/14)          | 14.29% (2/14)         | 0.00% (0/14)          |
| PRODUCT               | 100.00% (1/1)           | 0.00% (0/1)           | 0.00% (0/1)           |
| FINANCIAL_INFORMATION | 83.33% (5/6)            | 0.00% (0/6)           | 16.67% (1/6)          |
| PHONE_NUMBER          | 100.00% (2/2)           | 0.00% (0/2)           | 0.00% (0/2)           |
| EDUCATIONAL_RECORD    | 100.00% (11/11)         | 0.00% (0/11)          | 0.00% (0/11)          |
| ID_NUMBER             | 100.00% (2/2)           | 0.00% (0/2)           | 0.00% (0/2)           |
| KEYS                  | 100.00% (1/1)           | 0.00% (0/1)           | 0.00% (0/1)           |
| GPA                   | 100.00% (1/1)           | 0.00% (0/1)           | 0.00% (0/1)           |
| <b>Overall</b>        | <b>86.20% (706/819)</b> | <b>7.08% (58/819)</b> | <b>6.72% (55/819)</b> |

Table 52: Weighted Results per Type and Overall (Oracle for **WildChat**), Model: **gpt-4.1-nano**

| Type                  | Weighted Redact         | Weighted Abstract     | Weighted Retain       |
|-----------------------|-------------------------|-----------------------|-----------------------|
| NAME                  | 88.82% (135/152)        | 5.92% (9/152)         | 5.26% (8/152)         |
| AFFILIATION           | 91.61% (131/143)        | 4.20% (6/143)         | 4.20% (6/143)         |
| GEOLOCATION           | 81.01% (192/237)        | 9.28% (22/237)        | 9.70% (23/237)        |
| USERNAME              | 100.00% (2/2)           | 0.00% (0/2)           | 0.00% (0/2)           |
| TIME                  | 85.23% (127/149)        | 6.71% (10/149)        | 8.05% (12/149)        |
| AGE                   | 72.73% (16/22)          | 9.09% (2/22)          | 18.18% (4/22)         |
| OCCUPATION            | 89.19% (33/37)          | 5.41% (2/37)          | 5.41% (2/37)          |
| QUANTITY              | 100.00% (6/6)           | 0.00% (0/6)           | 0.00% (0/6)           |
| ETHNICITY             | 77.78% (7/9)            | 0.00% (0/9)           | 22.22% (2/9)          |
| GENDER                | 71.43% (5/7)            | 14.29% (1/7)          | 14.29% (1/7)          |
| EMAIL                 | 100.00% (2/2)           | 0.00% (0/2)           | 0.00% (0/2)           |
| URL                   | 100.00% (8/8)           | 0.00% (0/8)           | 0.00% (0/8)           |
| HEALTH_INFORMATION    | 83.33% (5/6)            | 16.67% (1/6)          | 0.00% (0/6)           |
| RACE                  | 100.00% (1/1)           | 0.00% (0/1)           | 0.00% (0/1)           |
| INCOME                | 100.00% (14/14)         | 0.00% (0/14)          | 0.00% (0/14)          |
| PRODUCT               | 100.00% (1/1)           | 0.00% (0/1)           | 0.00% (0/1)           |
| FINANCIAL_INFORMATION | 83.33% (5/6)            | 16.67% (1/6)          | 0.00% (0/6)           |
| PHONE_NUMBER          | 100.00% (2/2)           | 0.00% (0/2)           | 0.00% (0/2)           |
| EDUCATIONAL_RECORD    | 81.82% (9/11)           | 18.18% (2/11)         | 0.00% (0/11)          |
| ID_NUMBER             | 100.00% (2/2)           | 0.00% (0/2)           | 0.00% (0/2)           |
| KEYS                  | 100.00% (1/1)           | 0.00% (0/1)           | 0.00% (0/1)           |
| GPA                   | 100.00% (1/1)           | 0.00% (0/1)           | 0.00% (0/1)           |
| <b>Overall</b>        | <b>86.08% (705/819)</b> | <b>6.84% (56/819)</b> | <b>7.08% (58/819)</b> |

Table 53: Weighted Results per Type and Overall (Oracle for **WildChat**), Model: **gpt-4.1**

| Type                  | Weighted Redact         | Weighted Abstract     | Weighted Retain       |
|-----------------------|-------------------------|-----------------------|-----------------------|
| NAME                  | 89.47% (136/152)        | 7.89% (12/152)        | 2.63% (4/152)         |
| AFFILIATION           | 93.71% (134/143)        | 4.90% (7/143)         | 1.40% (2/143)         |
| GEOLOCATION           | 86.50% (205/237)        | 9.70% (23/237)        | 3.80% (9/237)         |
| USERNAME              | 100.00% (2/2)           | 0.00% (0/2)           | 0.00% (0/2)           |
| TIME                  | 91.28% (136/149)        | 4.03% (6/149)         | 4.70% (7/149)         |
| AGE                   | 77.27% (17/22)          | 13.64% (3/22)         | 9.09% (2/22)          |
| OCCUPATION            | 86.49% (32/37)          | 8.11% (3/37)          | 5.41% (2/37)          |
| QUANTITY              | 100.00% (6/6)           | 0.00% (0/6)           | 0.00% (0/6)           |
| ETHNICITY             | 77.78% (7/9)            | 11.11% (1/9)          | 11.11% (1/9)          |
| GENDER                | 85.71% (6/7)            | 0.00% (0/7)           | 14.29% (1/7)          |
| EMAIL                 | 100.00% (2/2)           | 0.00% (0/2)           | 0.00% (0/2)           |
| URL                   | 100.00% (8/8)           | 0.00% (0/8)           | 0.00% (0/8)           |
| HEALTH_INFORMATION    | 100.00% (6/6)           | 0.00% (0/6)           | 0.00% (0/6)           |
| RACE                  | 100.00% (1/1)           | 0.00% (0/1)           | 0.00% (0/1)           |
| INCOME                | 100.00% (14/14)         | 0.00% (0/14)          | 0.00% (0/14)          |
| PRODUCT               | 100.00% (1/1)           | 0.00% (0/1)           | 0.00% (0/1)           |
| FINANCIAL_INFORMATION | 83.33% (5/6)            | 0.00% (0/6)           | 16.67% (1/6)          |
| PHONE_NUMBER          | 100.00% (2/2)           | 0.00% (0/2)           | 0.00% (0/2)           |
| EDUCATIONAL_RECORD    | 100.00% (11/11)         | 0.00% (0/11)          | 0.00% (0/11)          |
| ID_NUMBER             | 100.00% (2/2)           | 0.00% (0/2)           | 0.00% (0/2)           |
| KEYS                  | 100.00% (1/1)           | 0.00% (0/1)           | 0.00% (0/1)           |
| GPA                   | 100.00% (1/1)           | 0.00% (0/1)           | 0.00% (0/1)           |
| <b>Overall</b>        | <b>89.74% (735/819)</b> | <b>6.72% (55/819)</b> | <b>3.54% (29/819)</b> |

Table 54: Weighted Results per Type and Overall (Oracle for **WildChat**), Model: **gpt-5**

| Type                  | Weighted Redact         | Weighted Abstract     | Weighted Retain        |
|-----------------------|-------------------------|-----------------------|------------------------|
| NAME                  | 77.63% (118/152)        | 9.87% (15/152)        | 12.50% (19/152)        |
| AFFILIATION           | 83.92% (120/143)        | 7.69% (11/143)        | 8.39% (12/143)         |
| GEOLOCATION           | 78.06% (185/237)        | 9.28% (22/237)        | 12.66% (30/237)        |
| USERNAME              | 100.00% (2/2)           | 0.00% (0/2)           | 0.00% (0/2)            |
| TIME                  | 83.89% (125/149)        | 10.74% (16/149)       | 5.37% (8/149)          |
| AGE                   | 63.64% (14/22)          | 13.64% (3/22)         | 22.73% (5/22)          |
| OCCUPATION            | 78.38% (29/37)          | 5.41% (2/37)          | 16.22% (6/37)          |
| QUANTITY              | 100.00% (6/6)           | 0.00% (0/6)           | 0.00% (0/6)            |
| ETHNICITY             | 33.33% (3/9)            | 0.00% (0/9)           | 66.67% (6/9)           |
| GENDER                | 85.71% (6/7)            | 0.00% (0/7)           | 14.29% (1/7)           |
| EMAIL                 | 100.00% (2/2)           | 0.00% (0/2)           | 0.00% (0/2)            |
| URL                   | 75.00% (6/8)            | 12.50% (1/8)          | 12.50% (1/8)           |
| HEALTH_INFORMATION    | 100.00% (6/6)           | 0.00% (0/6)           | 0.00% (0/6)            |
| RACE                  | 0.00% (0/1)             | 100.00% (1/1)         | 0.00% (0/1)            |
| INCOME                | 100.00% (14/14)         | 0.00% (0/14)          | 0.00% (0/14)           |
| PRODUCT               | 100.00% (1/1)           | 0.00% (0/1)           | 0.00% (0/1)            |
| FINANCIAL_INFORMATION | 66.67% (4/6)            | 16.67% (1/6)          | 16.67% (1/6)           |
| PHONE_NUMBER          | 100.00% (2/2)           | 0.00% (0/2)           | 0.00% (0/2)            |
| EDUCATIONAL_RECORD    | 100.00% (11/11)         | 0.00% (0/11)          | 0.00% (0/11)           |
| ID_NUMBER             | 100.00% (2/2)           | 0.00% (0/2)           | 0.00% (0/2)            |
| KEYS                  | 100.00% (1/1)           | 0.00% (0/1)           | 0.00% (0/1)            |
| GPA                   | 100.00% (1/1)           | 0.00% (0/1)           | 0.00% (0/1)            |
| <b>Overall</b>        | <b>80.34% (658/819)</b> | <b>8.79% (72/819)</b> | <b>10.87% (89/819)</b> |

Table 55: Weighted Results per Type and Overall (Oracle for **WildChat**), Model: **claude-3-7-sonnet-20250219**

| Type                  | Weighted Redact         | Weighted Abstract     | Weighted Retain       |
|-----------------------|-------------------------|-----------------------|-----------------------|
| NAME                  | 81.58% (124/152)        | 7.24% (11/152)        | 11.18% (17/152)       |
| AFFILIATION           | 85.31% (122/143)        | 6.29% (9/143)         | 8.39% (12/143)        |
| GEOLOCATION           | 78.90% (187/237)        | 9.70% (23/237)        | 11.39% (27/237)       |
| USERNAME              | 100.00% (2/2)           | 0.00% (0/2)           | 0.00% (0/2)           |
| TIME                  | 81.21% (121/149)        | 12.08% (18/149)       | 6.71% (10/149)        |
| AGE                   | 63.64% (14/22)          | 13.64% (3/22)         | 22.73% (5/22)         |
| OCCUPATION            | 83.78% (31/37)          | 5.41% (2/37)          | 10.81% (4/37)         |
| QUANTITY              | 100.00% (6/6)           | 0.00% (0/6)           | 0.00% (0/6)           |
| ETHNICITY             | 44.44% (4/9)            | 0.00% (0/9)           | 55.56% (5/9)          |
| GENDER                | 71.43% (5/7)            | 28.57% (2/7)          | 0.00% (0/7)           |
| EMAIL                 | 100.00% (2/2)           | 0.00% (0/2)           | 0.00% (0/2)           |
| URL                   | 100.00% (8/8)           | 0.00% (0/8)           | 0.00% (0/8)           |
| HEALTH_INFORMATION    | 83.33% (5/6)            | 16.67% (1/6)          | 0.00% (0/6)           |
| RACE                  | 100.00% (1/1)           | 0.00% (0/1)           | 0.00% (0/1)           |
| INCOME                | 92.86% (13/14)          | 0.00% (0/14)          | 7.14% (1/14)          |
| PRODUCT               | 100.00% (1/1)           | 0.00% (0/1)           | 0.00% (0/1)           |
| FINANCIAL_INFORMATION | 83.33% (5/6)            | 16.67% (1/6)          | 0.00% (0/6)           |
| PHONE_NUMBER          | 100.00% (2/2)           | 0.00% (0/2)           | 0.00% (0/2)           |
| EDUCATIONAL_RECORD    | 81.82% (9/11)           | 18.18% (2/11)         | 0.00% (0/11)          |
| ID_NUMBER             | 100.00% (2/2)           | 0.00% (0/2)           | 0.00% (0/2)           |
| KEYS                  | 100.00% (1/1)           | 0.00% (0/1)           | 0.00% (0/1)           |
| GPA                   | 100.00% (1/1)           | 0.00% (0/1)           | 0.00% (0/1)           |
| <b>Overall</b>        | <b>81.32% (666/819)</b> | <b>8.79% (72/819)</b> | <b>9.89% (81/819)</b> |

Table 56: Weighted Results per Type and Overall (Oracle for **WildChat**), Model: **claude-sonnet-4-20250514**

| Type                  | Weighted Redact         | Weighted Abstract       | Weighted Retain         |
|-----------------------|-------------------------|-------------------------|-------------------------|
| NAME                  | 67.76% (103/152)        | 18.42% (28/152)         | 13.82% (21/152)         |
| AFFILIATION           | 73.43% (105/143)        | 12.59% (18/143)         | 13.99% (20/143)         |
| GEOLOCATION           | 67.09% (159/237)        | 12.24% (29/237)         | 20.68% (49/237)         |
| USERNAME              | 50.00% (1/2)            | 50.00% (1/2)            | 0.00% (0/2)             |
| TIME                  | 65.10% (97/149)         | 18.12% (27/149)         | 16.78% (25/149)         |
| AGE                   | 63.64% (14/22)          | 13.64% (3/22)           | 22.73% (5/22)           |
| OCCUPATION            | 72.97% (27/37)          | 10.81% (4/37)           | 16.22% (6/37)           |
| QUANTITY              | 66.67% (4/6)            | 16.67% (1/6)            | 16.67% (1/6)            |
| ETHNICITY             | 55.56% (5/9)            | 22.22% (2/9)            | 22.22% (2/9)            |
| GENDER                | 71.43% (5/7)            | 14.29% (1/7)            | 14.29% (1/7)            |
| EMAIL                 | 100.00% (2/2)           | 0.00% (0/2)             | 0.00% (0/2)             |
| URL                   | 87.50% (7/8)            | 12.50% (1/8)            | 0.00% (0/8)             |
| HEALTH_INFORMATION    | 66.67% (4/6)            | 16.67% (1/6)            | 16.67% (1/6)            |
| RACE                  | 100.00% (1/1)           | 0.00% (0/1)             | 0.00% (0/1)             |
| INCOME                | 92.86% (13/14)          | 0.00% (0/14)            | 7.14% (1/14)            |
| PRODUCT               | 100.00% (1/1)           | 0.00% (0/1)             | 0.00% (0/1)             |
| FINANCIAL_INFORMATION | 66.67% (4/6)            | 16.67% (1/6)            | 16.67% (1/6)            |
| PHONE_NUMBER          | 100.00% (2/2)           | 0.00% (0/2)             | 0.00% (0/2)             |
| EDUCATIONAL_RECORD    | 81.82% (9/11)           | 9.09% (1/11)            | 9.09% (1/11)            |
| ID_NUMBER             | 100.00% (2/2)           | 0.00% (0/2)             | 0.00% (0/2)             |
| KEYS                  | 100.00% (1/1)           | 0.00% (0/1)             | 0.00% (0/1)             |
| GPA                   | 100.00% (1/1)           | 0.00% (0/1)             | 0.00% (0/1)             |
| <b>Overall</b>        | <b>69.23% (567/819)</b> | <b>14.41% (118/819)</b> | <b>16.36% (134/819)</b> |

Table 57: Weighted Results per Type and Overall (Oracle for **WildChat**), Model: **lgai/xaone-deep-32b**

| Type                  | Weighted Redact         | Weighted Abstract     | Weighted Retain       |
|-----------------------|-------------------------|-----------------------|-----------------------|
| NAME                  | 83.55% (127/152)        | 8.55% (13/152)        | 7.89% (12/152)        |
| AFFILIATION           | 90.91% (130/143)        | 5.59% (8/143)         | 3.50% (5/143)         |
| GEOLOCATION           | 83.54% (198/237)        | 7.17% (17/237)        | 9.28% (22/237)        |
| USERNAME              | 100.00% (2/2)           | 0.00% (0/2)           | 0.00% (0/2)           |
| TIME                  | 83.22% (124/149)        | 10.07% (15/149)       | 6.71% (10/149)        |
| AGE                   | 77.27% (17/22)          | 9.09% (2/22)          | 13.64% (3/22)         |
| OCCUPATION            | 86.49% (32/37)          | 2.70% (1/37)          | 10.81% (4/37)         |
| QUANTITY              | 100.00% (6/6)           | 0.00% (0/6)           | 0.00% (0/6)           |
| ETHNICITY             | 66.67% (6/9)            | 11.11% (1/9)          | 22.22% (2/9)          |
| GENDER                | 71.43% (5/7)            | 14.29% (1/7)          | 14.29% (1/7)          |
| EMAIL                 | 100.00% (2/2)           | 0.00% (0/2)           | 0.00% (0/2)           |
| URL                   | 100.00% (8/8)           | 0.00% (0/8)           | 0.00% (0/8)           |
| HEALTH_INFORMATION    | 66.67% (4/6)            | 33.33% (2/6)          | 0.00% (0/6)           |
| RACE                  | 100.00% (1/1)           | 0.00% (0/1)           | 0.00% (0/1)           |
| INCOME                | 100.00% (14/14)         | 0.00% (0/14)          | 0.00% (0/14)          |
| PRODUCT               | 100.00% (1/1)           | 0.00% (0/1)           | 0.00% (0/1)           |
| FINANCIAL_INFORMATION | 66.67% (4/6)            | 16.67% (1/6)          | 16.67% (1/6)          |
| PHONE_NUMBER          | 100.00% (2/2)           | 0.00% (0/2)           | 0.00% (0/2)           |
| EDUCATIONAL_RECORD    | 100.00% (11/11)         | 0.00% (0/11)          | 0.00% (0/11)          |
| ID_NUMBER             | 100.00% (2/2)           | 0.00% (0/2)           | 0.00% (0/2)           |
| KEYS                  | 100.00% (1/1)           | 0.00% (0/1)           | 0.00% (0/1)           |
| GPA                   | 100.00% (1/1)           | 0.00% (0/1)           | 0.00% (0/1)           |
| <b>Overall</b>        | <b>85.23% (698/819)</b> | <b>7.45% (61/819)</b> | <b>7.33% (60/819)</b> |

Table 58: Weighted Results per Type and Overall (Oracle for **WildChat**), Model: **mistralai/mistral-small-3.1-24b-instruct**

| Type                  | Weighted Redact         | Weighted Abstract     | Weighted Retain        |
|-----------------------|-------------------------|-----------------------|------------------------|
| NAME                  | 83.55% (127/152)        | 5.26% (8/152)         | 11.18% (17/152)        |
| AFFILIATION           | 88.11% (126/143)        | 4.90% (7/143)         | 6.99% (10/143)         |
| GEOLOCATION           | 78.06% (185/237)        | 9.70% (23/237)        | 12.24% (29/237)        |
| USERNAME              | 50.00% (1/2)            | 0.00% (0/2)           | 50.00% (1/2)           |
| TIME                  | 75.17% (112/149)        | 10.07% (15/149)       | 14.77% (22/149)        |
| AGE                   | 81.82% (18/22)          | 0.00% (0/22)          | 18.18% (4/22)          |
| OCCUPATION            | 59.46% (22/37)          | 13.51% (5/37)         | 27.03% (10/37)         |
| QUANTITY              | 100.00% (6/6)           | 0.00% (0/6)           | 0.00% (0/6)            |
| ETHNICITY             | 66.67% (6/9)            | 0.00% (0/9)           | 33.33% (3/9)           |
| GENDER                | 71.43% (5/7)            | 14.29% (1/7)          | 14.29% (1/7)           |
| EMAIL                 | 100.00% (2/2)           | 0.00% (0/2)           | 0.00% (0/2)            |
| URL                   | 100.00% (8/8)           | 0.00% (0/8)           | 0.00% (0/8)            |
| HEALTH_INFORMATION    | 83.33% (5/6)            | 16.67% (1/6)          | 0.00% (0/6)            |
| RACE                  | 100.00% (1/1)           | 0.00% (0/1)           | 0.00% (0/1)            |
| INCOME                | 78.57% (11/14)          | 21.43% (3/14)         | 0.00% (0/14)           |
| PRODUCT               | 100.00% (1/1)           | 0.00% (0/1)           | 0.00% (0/1)            |
| FINANCIAL_INFORMATION | 83.33% (5/6)            | 0.00% (0/6)           | 16.67% (1/6)           |
| PHONE_NUMBER          | 100.00% (2/2)           | 0.00% (0/2)           | 0.00% (0/2)            |
| EDUCATIONAL_RECORD    | 81.82% (9/11)           | 18.18% (2/11)         | 0.00% (0/11)           |
| ID_NUMBER             | 100.00% (2/2)           | 0.00% (0/2)           | 0.00% (0/2)            |
| KEYS                  | 100.00% (1/1)           | 0.00% (0/1)           | 0.00% (0/1)            |
| GPA                   | 100.00% (1/1)           | 0.00% (0/1)           | 0.00% (0/1)            |
| <b>Overall</b>        | <b>80.10% (656/819)</b> | <b>7.94% (65/819)</b> | <b>11.97% (98/819)</b> |

Table 59: Weighted Results per Type and Overall (Oracle for **WildChat**), Model: **qwen/qwen2.5-7b-instruct**

| Type                  | Weighted Redact         | Weighted Abstract       | Weighted Retain         |
|-----------------------|-------------------------|-------------------------|-------------------------|
| NAME                  | 36.18% (55/152)         | 10.53% (16/152)         | 53.29% (81/152)         |
| AFFILIATION           | 36.36% (52/143)         | 16.08% (23/143)         | 47.55% (68/143)         |
| GEOLOCATION           | 24.05% (57/237)         | 21.10% (50/237)         | 54.85% (130/237)        |
| USERNAME              | 0.00% (0/2)             | 0.00% (0/2)             | 100.00% (2/2)           |
| TIME                  | 25.50% (38/149)         | 13.42% (20/149)         | 61.07% (91/149)         |
| AGE                   | 9.09% (2/22)            | 9.09% (2/22)            | 81.82% (18/22)          |
| OCCUPATION            | 29.73% (11/37)          | 8.11% (3/37)            | 62.16% (23/37)          |
| QUANTITY              | 50.00% (3/6)            | 50.00% (3/6)            | 0.00% (0/6)             |
| ETHNICITY             | 11.11% (1/9)            | 0.00% (0/9)             | 88.89% (8/9)            |
| GENDER                | 42.86% (3/7)            | 28.57% (2/7)            | 28.57% (2/7)            |
| EMAIL                 | 100.00% (2/2)           | 0.00% (0/2)             | 0.00% (0/2)             |
| URL                   | 50.00% (4/8)            | 25.00% (2/8)            | 25.00% (2/8)            |
| HEALTH_INFORMATION    | 16.67% (1/6)            | 0.00% (0/6)             | 83.33% (5/6)            |
| RACE                  | 0.00% (0/1)             | 0.00% (0/1)             | 100.00% (1/1)           |
| INCOME                | 7.14% (1/14)            | 0.00% (0/14)            | 92.86% (13/14)          |
| PRODUCT               | 0.00% (0/1)             | 0.00% (0/1)             | 100.00% (1/1)           |
| FINANCIAL_INFORMATION | 33.33% (2/6)            | 50.00% (3/6)            | 16.67% (1/6)            |
| PHONE_NUMBER          | 50.00% (1/2)            | 0.00% (0/2)             | 50.00% (1/2)            |
| EDUCATIONAL_RECORD    | 18.18% (2/11)           | 0.00% (0/11)            | 81.82% (9/11)           |
| ID_NUMBER             | 0.00% (0/2)             | 100.00% (2/2)           | 0.00% (0/2)             |
| KEYS                  | 100.00% (1/1)           | 0.00% (0/1)             | 0.00% (0/1)             |
| GPA                   | 0.00% (0/1)             | 0.00% (0/1)             | 100.00% (1/1)           |
| <b>Overall</b>        | <b>28.82% (236/819)</b> | <b>15.38% (126/819)</b> | <b>55.80% (457/819)</b> |

Table 60: Weighted Results per Type and Overall (Oracle for **WildChat**), Model: **qwen/qwen2.5-0.5b-instruct**

| Type                  | Weighted Redact         | Weighted Abstract       | Weighted Retain      |
|-----------------------|-------------------------|-------------------------|----------------------|
| NAME                  | 64.47% (98/152)         | 34.21% (52/152)         | 1.32% (2/152)        |
| AFFILIATION           | 44.76% (64/143)         | 55.24% (79/143)         | 0.00% (0/143)        |
| GEOLOCATION           | 59.07% (140/237)        | 40.93% (97/237)         | 0.00% (0/237)        |
| USERNAME              | 50.00% (1/2)            | 50.00% (1/2)            | 0.00% (0/2)          |
| TIME                  | 40.94% (61/149)         | 59.06% (88/149)         | 0.00% (0/149)        |
| AGE                   | 63.64% (14/22)          | 36.36% (8/22)           | 0.00% (0/22)         |
| OCCUPATION            | 45.95% (17/37)          | 54.05% (20/37)          | 0.00% (0/37)         |
| QUANTITY              | 50.00% (3/6)            | 50.00% (3/6)            | 0.00% (0/6)          |
| ETHNICITY             | 55.56% (5/9)            | 44.44% (4/9)            | 0.00% (0/9)          |
| GENDER                | 71.43% (5/7)            | 28.57% (2/7)            | 0.00% (0/7)          |
| EMAIL                 | 100.00% (2/2)           | 0.00% (0/2)             | 0.00% (0/2)          |
| URL                   | 87.50% (7/8)            | 12.50% (1/8)            | 0.00% (0/8)          |
| HEALTH_INFORMATION    | 83.33% (5/6)            | 16.67% (1/6)            | 0.00% (0/6)          |
| RACE                  | 100.00% (1/1)           | 0.00% (0/1)             | 0.00% (0/1)          |
| INCOME                | 92.86% (13/14)          | 7.14% (1/14)            | 0.00% (0/14)         |
| PRODUCT               | 100.00% (1/1)           | 0.00% (0/1)             | 0.00% (0/1)          |
| FINANCIAL_INFORMATION | 66.67% (4/6)            | 33.33% (2/6)            | 0.00% (0/6)          |
| PHONE_NUMBER          | 100.00% (2/2)           | 0.00% (0/2)             | 0.00% (0/2)          |
| EDUCATIONAL_RECORD    | 0.00% (0/11)            | 100.00% (11/11)         | 0.00% (0/11)         |
| ID_NUMBER             | 100.00% (2/2)           | 0.00% (0/2)             | 0.00% (0/2)          |
| KEYS                  | 100.00% (1/1)           | 0.00% (0/1)             | 0.00% (0/1)          |
| GPA                   | 0.00% (0/1)             | 100.00% (1/1)           | 0.00% (0/1)          |
| <b>Overall</b>        | <b>54.46% (446/819)</b> | <b>45.30% (371/819)</b> | <b>0.24% (2/819)</b> |

Table 61: Weighted Results per Type and Overall (Prediction for **WildChat**), Model: **gpt-4.1-nano**

| Type                  | Weighted Redact      | Weighted Abstract       | Weighted Retain       |
|-----------------------|----------------------|-------------------------|-----------------------|
| NAME                  | 0.00% (0/152)        | 100.00% (152/152)       | 0.00% (0/152)         |
| AFFILIATION           | 0.00% (0/143)        | 100.00% (143/143)       | 0.00% (0/143)         |
| GEOLOCATION           | 0.00% (0/237)        | 92.83% (220/237)        | 7.17% (17/237)        |
| USERNAME              | 0.00% (0/2)          | 100.00% (2/2)           | 0.00% (0/2)           |
| TIME                  | 0.00% (0/149)        | 98.66% (147/149)        | 1.34% (2/149)         |
| AGE                   | 0.00% (0/22)         | 95.45% (21/22)          | 4.55% (1/22)          |
| OCCUPATION            | 0.00% (0/37)         | 100.00% (37/37)         | 0.00% (0/37)          |
| QUANTITY              | 0.00% (0/6)          | 100.00% (6/6)           | 0.00% (0/6)           |
| ETHNICITY             | 0.00% (0/9)          | 100.00% (9/9)           | 0.00% (0/9)           |
| GENDER                | 0.00% (0/7)          | 100.00% (7/7)           | 0.00% (0/7)           |
| EMAIL                 | 0.00% (0/2)          | 100.00% (2/2)           | 0.00% (0/2)           |
| URL                   | 0.00% (0/8)          | 100.00% (8/8)           | 0.00% (0/8)           |
| HEALTH_INFORMATION    | 0.00% (0/6)          | 100.00% (6/6)           | 0.00% (0/6)           |
| RACE                  | 0.00% (0/1)          | 100.00% (1/1)           | 0.00% (0/1)           |
| INCOME                | 0.00% (0/14)         | 100.00% (14/14)         | 0.00% (0/14)          |
| PRODUCT               | 0.00% (0/1)          | 100.00% (1/1)           | 0.00% (0/1)           |
| FINANCIAL_INFORMATION | 0.00% (0/6)          | 100.00% (6/6)           | 0.00% (0/6)           |
| PHONE_NUMBER          | 0.00% (0/2)          | 100.00% (2/2)           | 0.00% (0/2)           |
| EDUCATIONAL_RECORD    | 0.00% (0/11)         | 100.00% (11/11)         | 0.00% (0/11)          |
| ID_NUMBER             | 0.00% (0/2)          | 100.00% (2/2)           | 0.00% (0/2)           |
| KEYS                  | 0.00% (0/1)          | 100.00% (1/1)           | 0.00% (0/1)           |
| GPA                   | 0.00% (0/1)          | 100.00% (1/1)           | 0.00% (0/1)           |
| <b>Overall</b>        | <b>0.00% (0/819)</b> | <b>97.56% (799/819)</b> | <b>2.44% (20/819)</b> |

Table 62: Weighted Results per Type and Overall (Prediction for **WildChat**), Model: **gpt-4.1**

| Type                  | Weighted Redact         | Weighted Abstract       | Weighted Retain         |
|-----------------------|-------------------------|-------------------------|-------------------------|
| NAME                  | 16.45% (25/152)         | 57.89% (88/152)         | 25.66% (39/152)         |
| AFFILIATION           | 11.19% (16/143)         | 59.44% (85/143)         | 29.37% (42/143)         |
| GEOLOCATION           | 8.44% (20/237)          | 57.38% (136/237)        | 34.18% (81/237)         |
| USERNAME              | 50.00% (1/2)            | 50.00% (1/2)            | 0.00% (0/2)             |
| TIME                  | 19.46% (29/149)         | 68.46% (102/149)        | 12.08% (18/149)         |
| AGE                   | 13.64% (3/22)           | 72.73% (16/22)          | 13.64% (3/22)           |
| OCCUPATION            | 2.70% (1/37)            | 75.68% (28/37)          | 21.62% (8/37)           |
| QUANTITY              | 0.00% (0/6)             | 16.67% (1/6)            | 83.33% (5/6)            |
| ETHNICITY             | 0.00% (0/9)             | 55.56% (5/9)            | 44.44% (4/9)            |
| GENDER                | 28.57% (2/7)            | 57.14% (4/7)            | 14.29% (1/7)            |
| EMAIL                 | 0.00% (0/2)             | 0.00% (0/2)             | 100.00% (2/2)           |
| URL                   | 12.50% (1/8)            | 50.00% (4/8)            | 37.50% (3/8)            |
| HEALTH_INFORMATION    | 0.00% (0/6)             | 100.00% (6/6)           | 0.00% (0/6)             |
| RACE                  | 0.00% (0/1)             | 0.00% (0/1)             | 100.00% (1/1)           |
| INCOME                | 14.29% (2/14)           | 85.71% (12/14)          | 0.00% (0/14)            |
| PRODUCT               | 0.00% (0/1)             | 0.00% (0/1)             | 100.00% (1/1)           |
| FINANCIAL_INFORMATION | 0.00% (0/6)             | 16.67% (1/6)            | 83.33% (5/6)            |
| PHONE_NUMBER          | 0.00% (0/2)             | 100.00% (2/2)           | 0.00% (0/2)             |
| EDUCATIONAL_RECORD    | 0.00% (0/11)            | 81.82% (9/11)           | 18.18% (2/11)           |
| ID_NUMBER             | 100.00% (2/2)           | 0.00% (0/2)             | 0.00% (0/2)             |
| KEYS                  | 0.00% (0/1)             | 100.00% (1/1)           | 0.00% (0/1)             |
| GPA                   | 0.00% (0/1)             | 100.00% (1/1)           | 0.00% (0/1)             |
| <b>Overall</b>        | <b>12.45% (102/819)</b> | <b>61.29% (502/819)</b> | <b>26.25% (215/819)</b> |

Table 63: Weighted Results per Type and Overall (Prediction for **WildChat**), Model: **gpt-5**

| Type                  | Weighted Redact       | Weighted Abstract       | Weighted Retain         |
|-----------------------|-----------------------|-------------------------|-------------------------|
| NAME                  | 1.97% (3/152)         | 61.84% (94/152)         | 36.18% (55/152)         |
| AFFILIATION           | 0.00% (0/143)         | 38.46% (55/143)         | 61.54% (88/143)         |
| GEOLOCATION           | 0.42% (1/237)         | 27.00% (64/237)         | 72.57% (172/237)        |
| USERNAME              | 50.00% (1/2)          | 50.00% (1/2)            | 0.00% (0/2)             |
| TIME                  | 3.36% (5/149)         | 27.52% (41/149)         | 69.13% (103/149)        |
| AGE                   | 4.55% (1/22)          | 45.45% (10/22)          | 50.00% (11/22)          |
| OCCUPATION            | 0.00% (0/37)          | 32.43% (12/37)          | 67.57% (25/37)          |
| QUANTITY              | 0.00% (0/6)           | 0.00% (0/6)             | 100.00% (6/6)           |
| ETHNICITY             | 0.00% (0/9)           | 11.11% (1/9)            | 88.89% (8/9)            |
| GENDER                | 0.00% (0/7)           | 0.00% (0/7)             | 100.00% (7/7)           |
| EMAIL                 | 0.00% (0/2)           | 50.00% (1/2)            | 50.00% (1/2)            |
| URL                   | 12.50% (1/8)          | 37.50% (3/8)            | 50.00% (4/8)            |
| HEALTH_INFORMATION    | 0.00% (0/6)           | 100.00% (6/6)           | 0.00% (0/6)             |
| RACE                  | 0.00% (0/1)           | 0.00% (0/1)             | 100.00% (1/1)           |
| INCOME                | 0.00% (0/14)          | 28.57% (4/14)           | 71.43% (10/14)          |
| PRODUCT               | 0.00% (0/1)           | 100.00% (1/1)           | 0.00% (0/1)             |
| FINANCIAL_INFORMATION | 0.00% (0/6)           | 66.67% (4/6)            | 33.33% (2/6)            |
| PHONE_NUMBER          | 100.00% (2/2)         | 0.00% (0/2)             | 0.00% (0/2)             |
| EDUCATIONAL_RECORD    | 0.00% (0/11)          | 81.82% (9/11)           | 18.18% (2/11)           |
| ID_NUMBER             | 0.00% (0/2)           | 0.00% (0/2)             | 100.00% (2/2)           |
| KEYS                  | 100.00% (1/1)         | 0.00% (0/1)             | 0.00% (0/1)             |
| GPA                   | 0.00% (0/1)           | 100.00% (1/1)           | 0.00% (0/1)             |
| <b>Overall</b>        | <b>1.83% (15/819)</b> | <b>37.48% (307/819)</b> | <b>60.68% (497/819)</b> |

Table 64: Weighted Results per Type and Overall (Prediction for **WildChat**), Model: **claude-3-7-sonnet-20250219**

| Type                  | Weighted Redact      | Weighted Abstract       | Weighted Retain         |
|-----------------------|----------------------|-------------------------|-------------------------|
| NAME                  | 0.66% (1/152)        | 76.97% (117/152)        | 22.37% (34/152)         |
| AFFILIATION           | 0.00% (0/143)        | 60.84% (87/143)         | 39.16% (56/143)         |
| GEOLOCATION           | 0.42% (1/237)        | 34.60% (82/237)         | 64.98% (154/237)        |
| USERNAME              | 50.00% (1/2)         | 50.00% (1/2)            | 0.00% (0/2)             |
| TIME                  | 0.00% (0/149)        | 57.05% (85/149)         | 42.95% (64/149)         |
| AGE                   | 0.00% (0/22)         | 81.82% (18/22)          | 18.18% (4/22)           |
| OCCUPATION            | 0.00% (0/37)         | 62.16% (23/37)          | 37.84% (14/37)          |
| QUANTITY              | 0.00% (0/6)          | 100.00% (6/6)           | 0.00% (0/6)             |
| ETHNICITY             | 0.00% (0/9)          | 66.67% (6/9)            | 33.33% (3/9)            |
| GENDER                | 0.00% (0/7)          | 42.86% (3/7)            | 57.14% (4/7)            |
| EMAIL                 | 0.00% (0/2)          | 100.00% (2/2)           | 0.00% (0/2)             |
| URL                   | 12.50% (1/8)         | 75.00% (6/8)            | 12.50% (1/8)            |
| HEALTH_INFORMATION    | 0.00% (0/6)          | 100.00% (6/6)           | 0.00% (0/6)             |
| RACE                  | 0.00% (0/1)          | 100.00% (1/1)           | 0.00% (0/1)             |
| INCOME                | 0.00% (0/14)         | 100.00% (14/14)         | 0.00% (0/14)            |
| PRODUCT               | 0.00% (0/1)          | 100.00% (1/1)           | 0.00% (0/1)             |
| FINANCIAL_INFORMATION | 0.00% (0/6)          | 66.67% (4/6)            | 33.33% (2/6)            |
| PHONE_NUMBER          | 0.00% (0/2)          | 100.00% (2/2)           | 0.00% (0/2)             |
| EDUCATIONAL_RECORD    | 0.00% (0/11)         | 100.00% (11/11)         | 0.00% (0/11)            |
| ID_NUMBER             | 0.00% (0/2)          | 100.00% (2/2)           | 0.00% (0/2)             |
| KEYS                  | 0.00% (0/1)          | 100.00% (1/1)           | 0.00% (0/1)             |
| GPA                   | 0.00% (0/1)          | 100.00% (1/1)           | 0.00% (0/1)             |
| <b>Overall</b>        | <b>0.49% (4/819)</b> | <b>58.49% (479/819)</b> | <b>41.03% (336/819)</b> |

Table 65: Weighted Results per Type and Overall (Prediction for **WildChat**), Model: **claude-sonnet-4-20250514**

| Type                  | Weighted Redact         | Weighted Abstract       | Weighted Retain      |
|-----------------------|-------------------------|-------------------------|----------------------|
| NAME                  | 51.97% (79/152)         | 47.37% (72/152)         | 0.66% (1/152)        |
| AFFILIATION           | 34.27% (49/143)         | 65.73% (94/143)         | 0.00% (0/143)        |
| GEOLOCATION           | 35.86% (85/237)         | 64.14% (152/237)        | 0.00% (0/237)        |
| USERNAME              | 0.00% (0/2)             | 100.00% (2/2)           | 0.00% (0/2)          |
| TIME                  | 40.94% (61/149)         | 57.72% (86/149)         | 1.34% (2/149)        |
| AGE                   | 31.82% (7/22)           | 63.64% (14/22)          | 4.55% (1/22)         |
| OCCUPATION            | 13.51% (5/37)           | 86.49% (32/37)          | 0.00% (0/37)         |
| QUANTITY              | 0.00% (0/6)             | 100.00% (6/6)           | 0.00% (0/6)          |
| ETHNICITY             | 66.67% (6/9)            | 33.33% (3/9)            | 0.00% (0/9)          |
| GENDER                | 71.43% (5/7)            | 28.57% (2/7)            | 0.00% (0/7)          |
| EMAIL                 | 100.00% (2/2)           | 0.00% (0/2)             | 0.00% (0/2)          |
| URL                   | 75.00% (6/8)            | 25.00% (2/8)            | 0.00% (0/8)          |
| HEALTH_INFORMATION    | 16.67% (1/6)            | 83.33% (5/6)            | 0.00% (0/6)          |
| RACE                  | 100.00% (1/1)           | 0.00% (0/1)             | 0.00% (0/1)          |
| INCOME                | 0.00% (0/14)            | 100.00% (14/14)         | 0.00% (0/14)         |
| PRODUCT               | 0.00% (0/1)             | 100.00% (1/1)           | 0.00% (0/1)          |
| FINANCIAL_INFORMATION | 33.33% (2/6)            | 66.67% (4/6)            | 0.00% (0/6)          |
| PHONE_NUMBER          | 100.00% (2/2)           | 0.00% (0/2)             | 0.00% (0/2)          |
| EDUCATIONAL_RECORD    | 18.18% (2/11)           | 81.82% (9/11)           | 0.00% (0/11)         |
| ID_NUMBER             | 100.00% (2/2)           | 0.00% (0/2)             | 0.00% (0/2)          |
| KEYS                  | 100.00% (1/1)           | 0.00% (0/1)             | 0.00% (0/1)          |
| GPA                   | 0.00% (0/1)             | 100.00% (1/1)           | 0.00% (0/1)          |
| <b>Overall</b>        | <b>38.58% (316/819)</b> | <b>60.93% (499/819)</b> | <b>0.49% (4/819)</b> |

Table 66: Weighted Results per Type and Overall (Prediction for **WildChat**), Model: **lgai/exaone-deep-32b**

| Type                  | Weighted Redact      | Weighted Abstract       | Weighted Retain       |
|-----------------------|----------------------|-------------------------|-----------------------|
| NAME                  | 1.97% (3/152)        | 97.37% (148/152)        | 0.66% (1/152)         |
| AFFILIATION           | 0.00% (0/143)        | 98.60% (141/143)        | 1.40% (2/143)         |
| GEOLOCATION           | 0.00% (0/237)        | 99.58% (236/237)        | 0.42% (1/237)         |
| USERNAME              | 50.00% (1/2)         | 50.00% (1/2)            | 0.00% (0/2)           |
| TIME                  | 0.00% (0/149)        | 97.99% (146/149)        | 2.01% (3/149)         |
| AGE                   | 4.55% (1/22)         | 95.45% (21/22)          | 0.00% (0/22)          |
| OCCUPATION            | 0.00% (0/37)         | 94.59% (35/37)          | 5.41% (2/37)          |
| QUANTITY              | 0.00% (0/6)          | 100.00% (6/6)           | 0.00% (0/6)           |
| ETHNICITY             | 0.00% (0/9)          | 100.00% (9/9)           | 0.00% (0/9)           |
| GENDER                | 0.00% (0/7)          | 100.00% (7/7)           | 0.00% (0/7)           |
| EMAIL                 | 0.00% (0/2)          | 50.00% (1/2)            | 50.00% (1/2)          |
| URL                   | 12.50% (1/8)         | 87.50% (7/8)            | 0.00% (0/8)           |
| HEALTH_INFORMATION    | 0.00% (0/6)          | 100.00% (6/6)           | 0.00% (0/6)           |
| RACE                  | 0.00% (0/1)          | 100.00% (1/1)           | 0.00% (0/1)           |
| INCOME                | 0.00% (0/14)         | 100.00% (14/14)         | 0.00% (0/14)          |
| PRODUCT               | 0.00% (0/1)          | 100.00% (1/1)           | 0.00% (0/1)           |
| FINANCIAL_INFORMATION | 0.00% (0/6)          | 100.00% (6/6)           | 0.00% (0/6)           |
| PHONE_NUMBER          | 0.00% (0/2)          | 100.00% (2/2)           | 0.00% (0/2)           |
| EDUCATIONAL_RECORD    | 0.00% (0/11)         | 27.27% (3/11)           | 72.73% (8/11)         |
| ID_NUMBER             | 0.00% (0/2)          | 100.00% (2/2)           | 0.00% (0/2)           |
| KEYS                  | 0.00% (0/1)          | 100.00% (1/1)           | 0.00% (0/1)           |
| GPA                   | 0.00% (0/1)          | 100.00% (1/1)           | 0.00% (0/1)           |
| <b>Overall</b>        | <b>0.73% (6/819)</b> | <b>97.07% (795/819)</b> | <b>2.20% (18/819)</b> |

Table 67: Weighted Results per Type and Overall (Prediction for **WildChat**), Model: **mistralai/mistral-small-3.1-24b-instruct**

| Type                  | Weighted Redact       | Weighted Abstract       | Weighted Retain      |
|-----------------------|-----------------------|-------------------------|----------------------|
| NAME                  | 3.95% (6/152)         | 96.05% (146/152)        | 0.00% (0/152)        |
| AFFILIATION           | 0.00% (0/143)         | 97.90% (140/143)        | 2.10% (3/143)        |
| GEOLOCATION           | 1.27% (3/237)         | 98.73% (234/237)        | 0.00% (0/237)        |
| USERNAME              | 0.00% (0/2)           | 100.00% (2/2)           | 0.00% (0/2)          |
| TIME                  | 4.03% (6/149)         | 95.30% (142/149)        | 0.67% (1/149)        |
| AGE                   | 0.00% (0/22)          | 100.00% (22/22)         | 0.00% (0/22)         |
| OCCUPATION            | 0.00% (0/37)          | 100.00% (37/37)         | 0.00% (0/37)         |
| QUANTITY              | 0.00% (0/6)           | 100.00% (6/6)           | 0.00% (0/6)          |
| ETHNICITY             | 0.00% (0/9)           | 100.00% (9/9)           | 0.00% (0/9)          |
| GENDER                | 0.00% (0/7)           | 100.00% (7/7)           | 0.00% (0/7)          |
| EMAIL                 | 0.00% (0/2)           | 100.00% (2/2)           | 0.00% (0/2)          |
| URL                   | 0.00% (0/8)           | 100.00% (8/8)           | 0.00% (0/8)          |
| HEALTH_INFORMATION    | 0.00% (0/6)           | 100.00% (6/6)           | 0.00% (0/6)          |
| RACE                  | 0.00% (0/1)           | 100.00% (1/1)           | 0.00% (0/1)          |
| INCOME                | 0.00% (0/14)          | 100.00% (14/14)         | 0.00% (0/14)         |
| PRODUCT               | 0.00% (0/1)           | 100.00% (1/1)           | 0.00% (0/1)          |
| FINANCIAL_INFORMATION | 0.00% (0/6)           | 100.00% (6/6)           | 0.00% (0/6)          |
| PHONE_NUMBER          | 0.00% (0/2)           | 100.00% (2/2)           | 0.00% (0/2)          |
| EDUCATIONAL_RECORD    | 0.00% (0/11)          | 100.00% (11/11)         | 0.00% (0/11)         |
| ID_NUMBER             | 0.00% (0/2)           | 100.00% (2/2)           | 0.00% (0/2)          |
| KEYS                  | 100.00% (1/1)         | 0.00% (0/1)             | 0.00% (0/1)          |
| GPA                   | 0.00% (0/1)           | 100.00% (1/1)           | 0.00% (0/1)          |
| <b>Overall</b>        | <b>1.95% (16/819)</b> | <b>97.56% (799/819)</b> | <b>0.49% (4/819)</b> |

Table 68: Weighted Results per Type and Overall (Prediction for **WildChat**), Model: **qwen/qwen2.5-7b-instruct**
